# Supplementary material for: Multi-color solid-state emission of β-iminoenolate boron complexes tuned by methoxyl groups: aggregation-induced emission and mechanofluorochromism
Source: Royal Society of Chemistry journal article supplement (doi:10.1039/c6ra03722d), 2016-01-01
Supplement: c6ra03722d1.pdf [file c6ra03722d1.pdf]

**Supporting Information For:**

**Multi-color solid-state emission of  $\beta$ -iminoenolate boron complexes  
tuned by methoxyl group: Aggregation-induced emission and  
mechanofluorochromism**

Zhenqi Zhang, Zhu Wu, Jingbo Sun, Pengchong Xue and Ran Lu\*

*State Key Laboratory of Supramolecular Structure and Materials, College of Chemistry,*

*Jilin University, Changchun 130012, P. R. China*

*Fax: +86-431-88923907; Tel: +86-431-88499179*

*E-Mail: [luran@mail.jlu.edu.cn](mailto:luran@mail.jlu.edu.cn)*

**Table S1.** Photophysical properties of  $\beta$ -iminoenolate boron complexes in solution.

| Compound     | Solvents    | $\lambda_{\text{abs}}^{\text{a}}$ | $\lambda_{\text{em}}^{\text{a}}$ | Stokes shift ( $\text{cm}^{-1}$ ) | $\Phi_{\text{F}}^{\text{b}}$ |
|--------------|-------------|-----------------------------------|----------------------------------|-----------------------------------|------------------------------|
| <b>BB</b>    | Cyclohexane | 351(39911)                        | 410                              | 4100                              | 0.01                         |
|              | Toluene     | 355(35400)                        | 428                              | 4805                              | 0.01                         |
|              | THF         | 352(39854)                        | 425                              | 4880                              | 0.01                         |
|              | DCM         | 351(39659)                        | 430                              | 5234                              | 0.01                         |
|              | DMF         | 352(36760)                        | 427                              | 4990                              | 0.01                         |
| <b>B2B</b>   | Cyclohexane | 355(47654), 369(46107)            | 409                              | 3719                              | 0.01                         |
|              | Toluene     | 359(42167), 372(42695)            | 430                              | 3626                              | 0.01                         |
|              | THF         | 358(39913), 371(40282)            | 425                              | 3425                              | 0.01                         |
|              | DCM         | 358(44032), 371(44766)            | 428                              | 3590                              | 0.01                         |
|              | DMF         | 360(41248), 371(42056)            | 425                              | 3425                              | 0.01                         |
| <b>B3B</b>   | Cyclohexane | 355(30268)                        | 409                              | 3719                              | 0.01                         |
|              | Toluene     | 357(40127)                        | 430                              | 4755                              | 0.01                         |
|              | THF         | 355(37232)                        | 427                              | 4750                              | 0.01                         |
|              | DCM         | 355(44016)                        | 427                              | 4750                              | 0.01                         |
|              | DMF         | 356(42415)                        | 427                              | 4671                              | 0.01                         |
| <b>B4B</b>   | Cyclohexane | 360(36907), 370(35739)            | 426                              | 4304                              | 0.02                         |
|              | Toluene     | 363(46425), 374(46049)            | 433                              | 4453                              | 0.02                         |
|              | THF         | 362(48707), 371(48064)            | 430                              | 4368                              | 0.02                         |
|              | DCM         | 361(51712), 373(50802)            | 430                              | 4445                              | 0.02                         |
|              | DMF         | 363(47760), 375(47763)            | 433                              | 3572                              | 0.03                         |
| <b>B24B</b>  | Cyclohexane | 374(38344)                        | 426                              | 3264                              | 0.02                         |
|              | Toluene     | 378(47020)                        | 433                              | 3360                              | 0.03                         |
|              | THF         | 378(50606)                        | 431                              | 3253                              | 0.03                         |
|              | DCM         | 378(49495)                        | 433                              | 3360                              | 0.03                         |
|              | DMF         | 378(47045)                        | 437                              | 3572                              | 0.04                         |
| <b>B25B</b>  | Cyclohexane | 345(22374), 379(29834)            | 431                              | 3183                              | 0.02                         |
|              | Toluene     | 347(18884), 385(26292)            | 444                              | 3451                              | 0.06                         |
|              | THF         | 346(25641), 381(32513)            | 453                              | 4172                              | 0.08                         |
|              | DCM         | 346(21689), 383(27400)            | 456                              | 4180                              | 0.11                         |
|              | DMF         | 347(20239), 383(24617)            | 474                              | 5013                              | 0.29                         |
| <b>B345B</b> | Cyclohexane | 365(33488)                        | 433                              | 4303                              | 0.03                         |
|              | Toluene     | 366(36134)                        | 444                              | 4800                              | 0.04                         |
|              | THF         | 365(26825)                        | 442                              | 4773                              | 0.04                         |
|              | DCM         | 364(39444)                        | 444                              | 4950                              | 0.03                         |
|              | DMF         | 368(37615)                        | 446                              | 4752                              | 0.06                         |

<sup>a</sup> The maximum absorption and fluorescence emission wavelength in solution ( $1 \times 10^{-5}$  M), <sup>b</sup> The fluorescence quantum yield ( $\Phi_{\text{F}}$ ) was measured using quinine sulfate in  $\text{H}_2\text{SO}_4$  (0.1 M) ( $\Phi_{\text{F}} = 0.55$ ) as standard.

**Table S2.** Emitting properties of  $\beta$ -iminoenolate boron complexes in THF and aggregation states.

|              | In THF                |            | In THF/H <sub>2</sub> O             |                  | In solid              |                       |
|--------------|-----------------------|------------|-------------------------------------|------------------|-----------------------|-----------------------|
|              | $\lambda_{em}^a$ (nm) | $\Phi_F^b$ | $\lambda_{em}(nm)$ (%) <sup>c</sup> | I/I <sub>0</sub> | $\lambda_{em}^d$ (nm) | $\lambda_{em}^e$ (nm) |
| <b>BB</b>    | 425                   | 0.01       | 468 (90)                            | 44               | 478                   | 476                   |
| <b>B2B</b>   | 425                   | 0.01       | 436,459 (95)                        | 91               | 439                   | 461                   |
| <b>B3B</b>   | 427                   | 0.01       | 471 (80)                            | 48               | 462                   | 473                   |
| <b>B4B</b>   | 430                   | 0.02       | 480,550 (90)                        | 12               | 480, 550              | 480, 550              |
| <b>B24B</b>  | 431                   | 0.03       | 476 (95)                            | 11               | 471                   | 470                   |
| <b>B25B</b>  | 453                   | 0.08       | 476 (80)                            | 1.2              | 466                   | 500                   |
| <b>B345B</b> | 442                   | 0.04       | 500 (90)                            | 2.6              | 505                   | 512                   |

<sup>a</sup> The maximum fluorescence emission wavelength in THF solution ( $1 \times 10^{-5}$  M), <sup>b</sup> The fluorescence quantum yield ( $\Phi_F$ ) in THF using quinine sulfate in H<sub>2</sub>SO<sub>4</sub> (0.1M) ( $\Phi_F = 0.55$ ) as standard, <sup>c</sup> The maximum emission intensity in THF/H<sub>2</sub>O and the corresponding water content, <sup>d</sup> The maximum emission wavelength of the as-synthesized powder, <sup>e</sup> The maximum emission wavelength of the single crystal.

**Table S3.** Fluorescence lifetimes of **B4B** in solutions and in solid states.

| State                               | Wavelength (nm) | Lifetime (ns) |
|-------------------------------------|-----------------|---------------|
| In THF                              | 430             | 0.48          |
| In THF/H <sub>2</sub> O (v/v = 2/8) | 480             | 18.54         |
| In THF/H <sub>2</sub> O (v/v = 1/9) | 480             | 13.28         |
|                                     | 550             | 23.68         |
| Crystal                             | 480             | 10.47         |
|                                     | 550             | 16.89         |
| Ground powder 1                     | 505             | 14.87         |
| Ground powder 2                     | 450             | 3.20          |

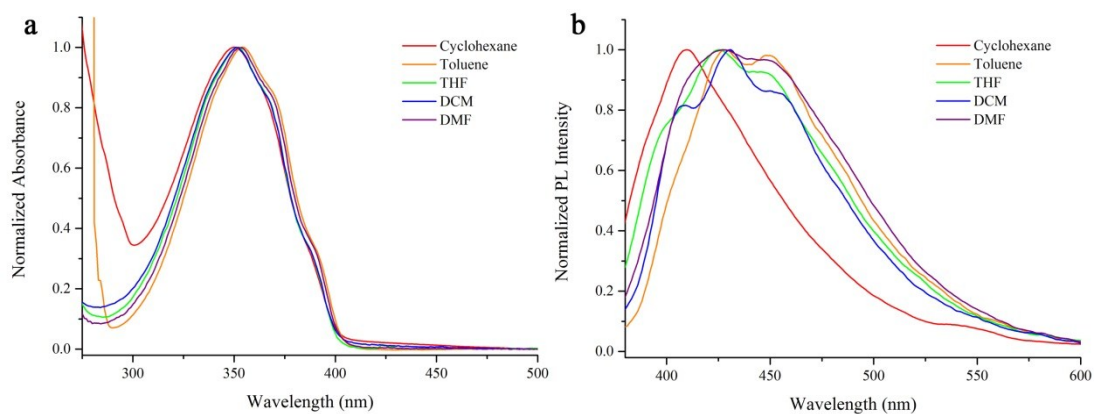

**Figure S1.** Normalized UV-vis (a) and PL spectra (b) ( $\lambda_{\text{ex}} = 365$  nm) of **BB** in different solvents ( $1 \times 10^{-5}$  mol/L).

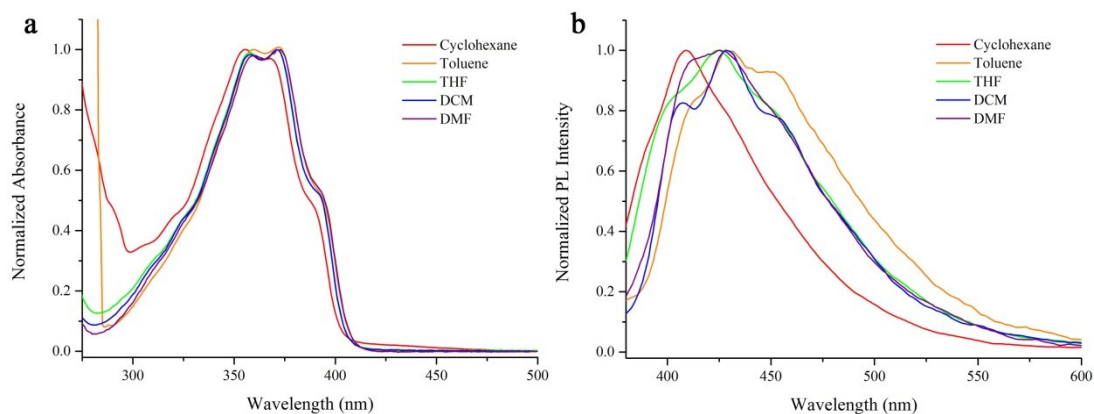

**Figure S2.** Normalized UV-vis (a) and PL spectra (b) ( $\lambda_{\text{ex}} = 365$  nm) of **B2B** in different solvents ( $1 \times 10^{-5}$  mol/L).

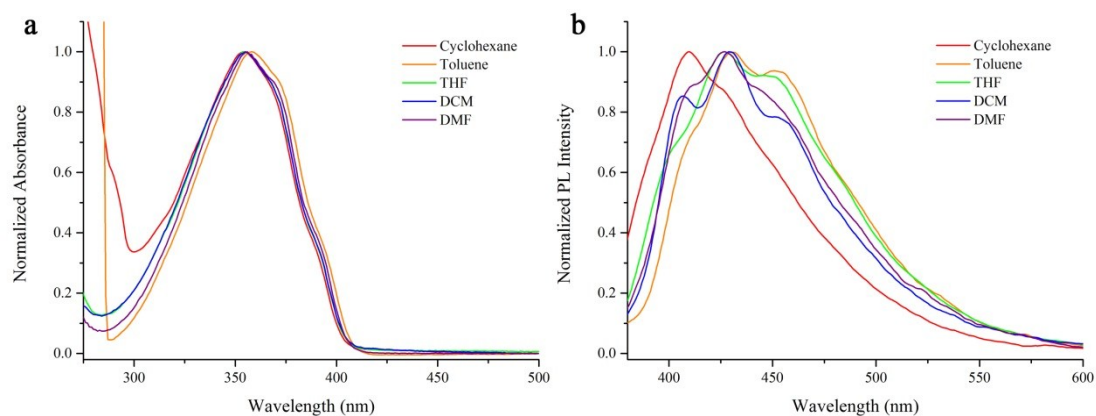

**Figure S3.** Normalized UV-vis (a) and PL spectra (b) ( $\lambda_{\text{ex}} = 365$  nm) of **B3B** in different solvents ( $1 \times 10^{-5}$  mol/L).

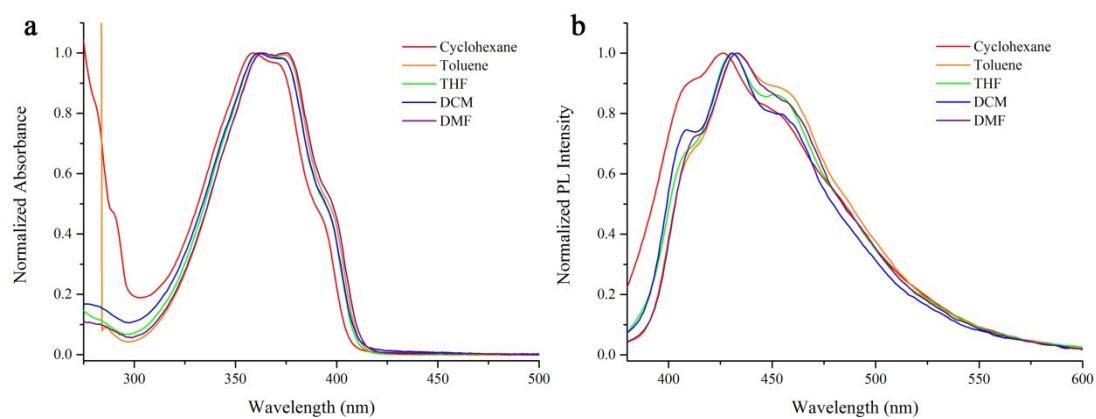

**Figure S4.** Normalized UV-vis (a) and PL spectra (b) ( $\lambda_{\text{ex}} = 365$  nm) of **B4B** in different solvents ( $1 \times 10^{-5}$  mol/L).

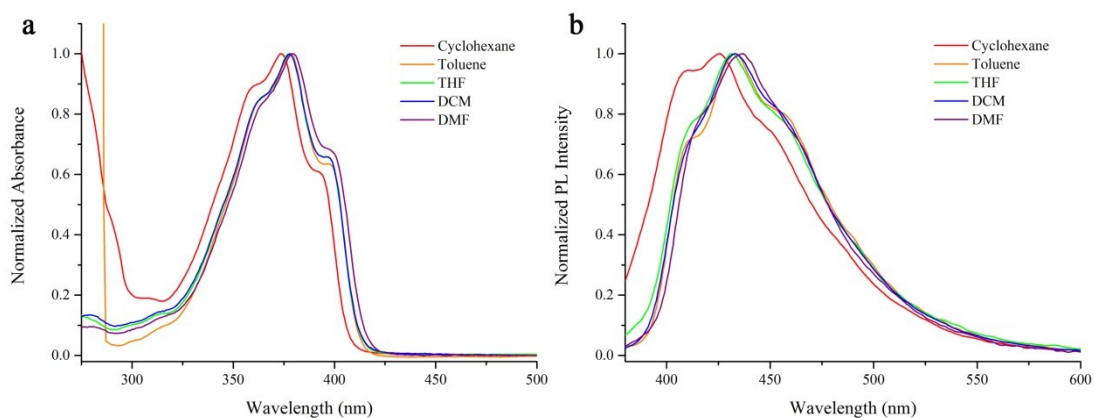

**Figure S5.** Normalized UV-vis (a) and PL spectra (b) ( $\lambda_{\text{ex}} = 365$  nm) of **B24B** in different solvents ( $1 \times 10^{-5}$  mol/L).

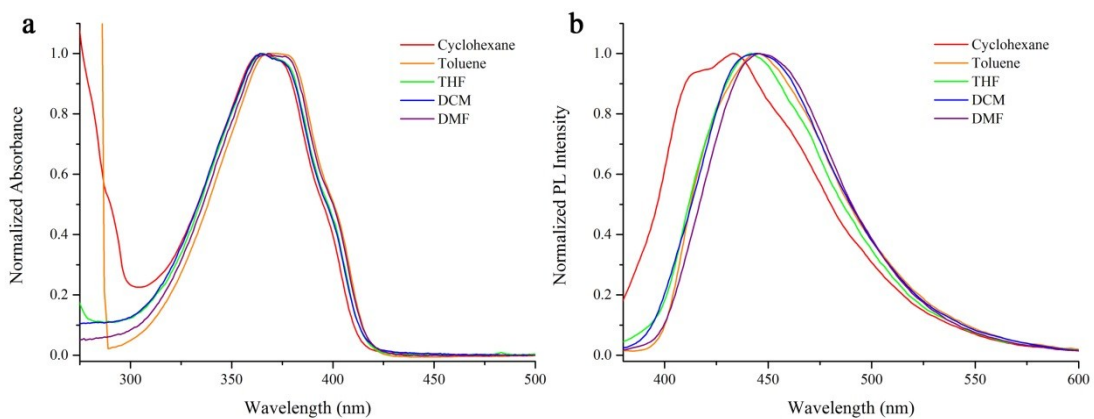

**Figure S6.** Normalized UV-vis (a) and PL spectra (b) ( $\lambda_{\text{ex}} = 365$  nm) of **B345B** in different solvents ( $1 \times 10^{-5}$  mol/L).

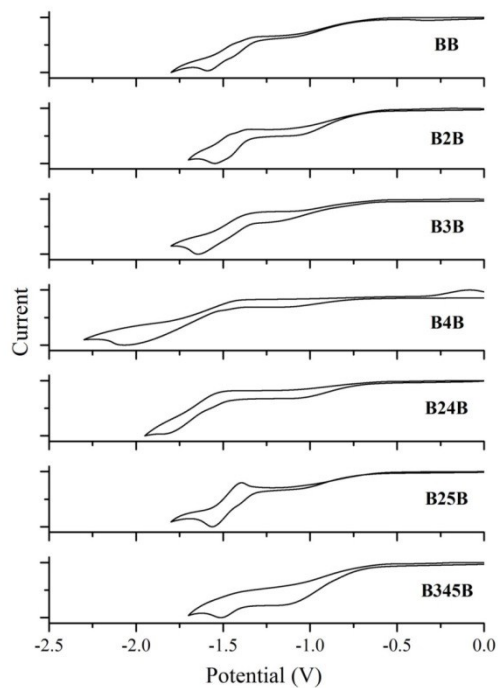

**Figure S7.** Cyclic voltammograms of **BB**, **B2B**, **B3B**, **B4B**, **B24B**, **B25B** and **B345B** measured in  $\text{CH}_2\text{Cl}_2$  with  $\text{Bu}_4\text{NBF}_4$  (0.1 M) as electrolyte at a scan rate of 50 mV/s .

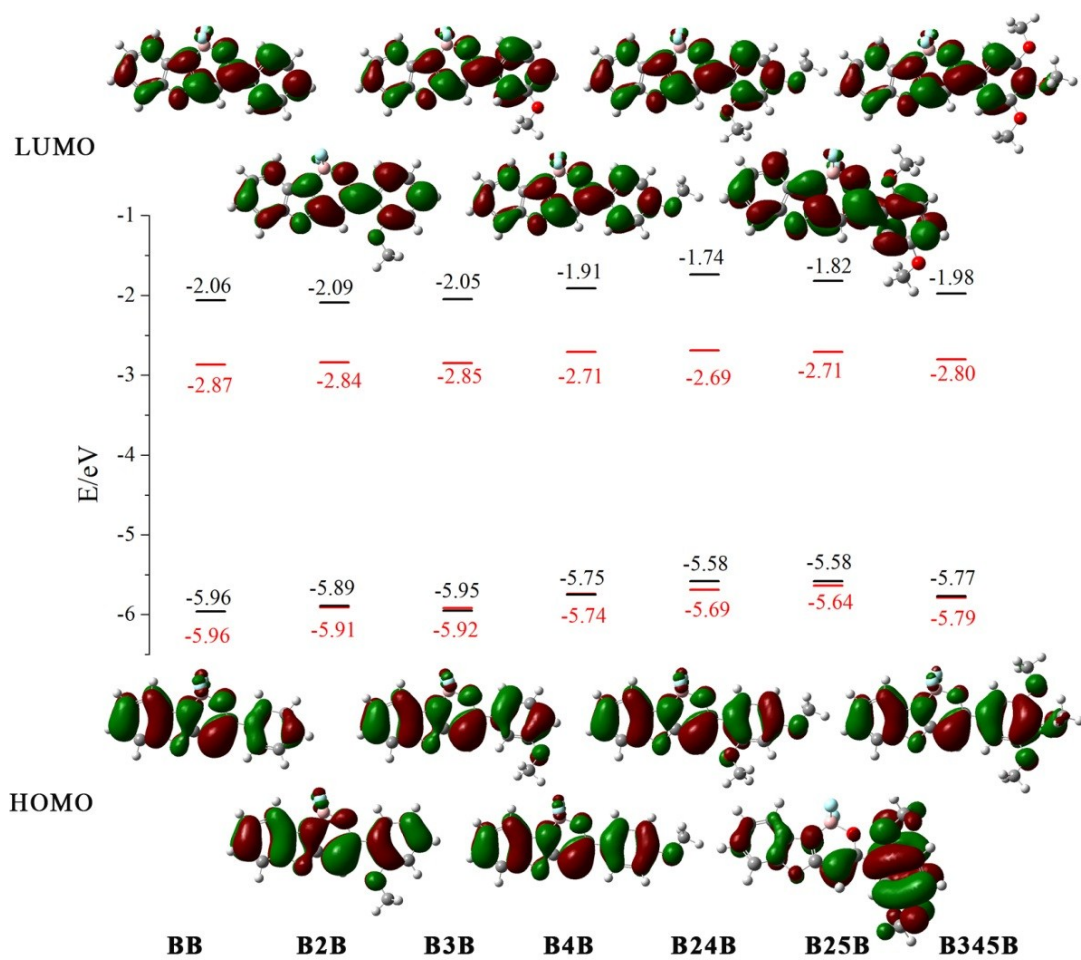

**Figure S8.** The frontier orbital plots of the HOMO/LUMO and the energy levels of the HOMO/LUMO obtained using electrochemical method (red) and DFT calculation (black).



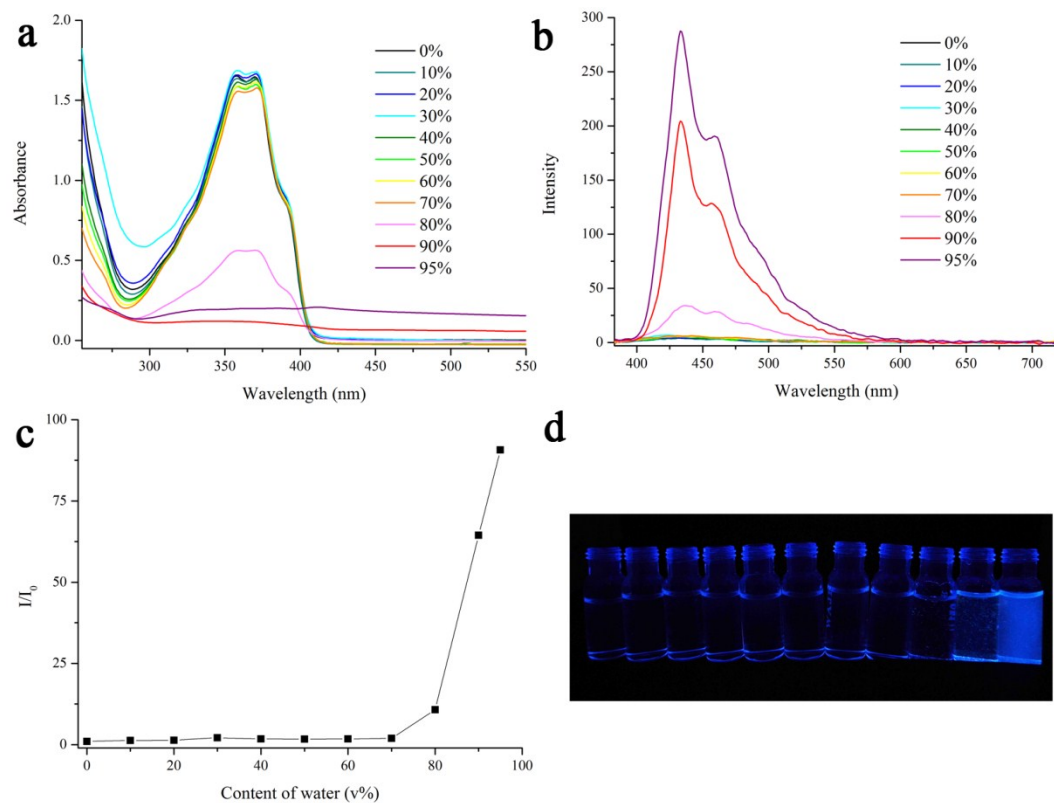

**Figure S9.** (a) UV-vis absorption and (b) fluorescence emission spectra ( $\lambda_{\text{ex}} = 365 \text{ nm}$ ) of **B2B** ( $5 \times 10^{-5} \text{ M}$ ) in THF/H<sub>2</sub>O with different amounts of water (% volume), (c) a plot of PL integral versus water content of the solvent mixture for **B2B** and (d) photograph of **B2B** ( $5 \times 10^{-5} \text{ M}$ ) in THF/H<sub>2</sub>O with different contents of water (0, 10, 20, 30, 40, 50, 60, 70, 80, 90, 95%) under UV light.

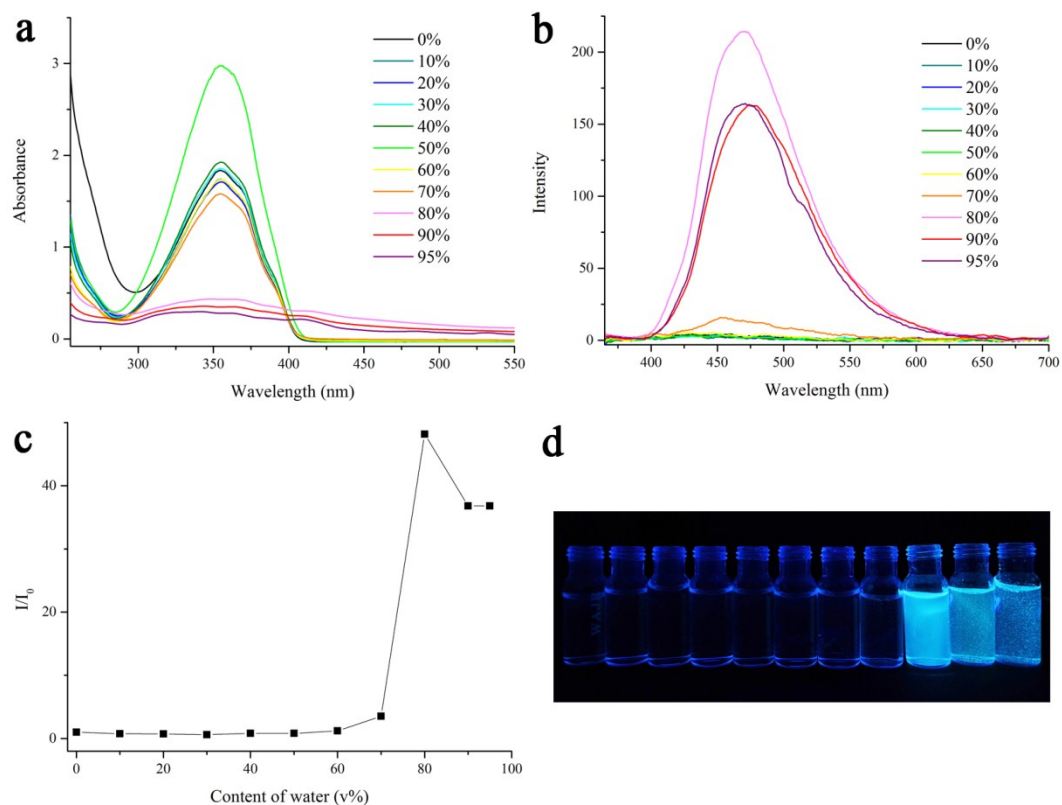

**Figure S10.** (a) UV-vis absorption and (b) fluorescence emission spectra ( $\lambda_{\text{ex}} = 365 \text{ nm}$ ) of **B3B** ( $5 \times 10^{-5} \text{ M}$ ) in THF/H<sub>2</sub>O with different amounts of water (% volume), (c) a plot of PL integral versus water content of the solvent mixture for **B3B** and (d) photograph of **B3B** ( $5 \times 10^{-5} \text{ M}$ ) in THF/H<sub>2</sub>O with different contents of water (0, 10, 20, 30, 40, 50, 60, 70, 80, 90, 95%) under UV light.

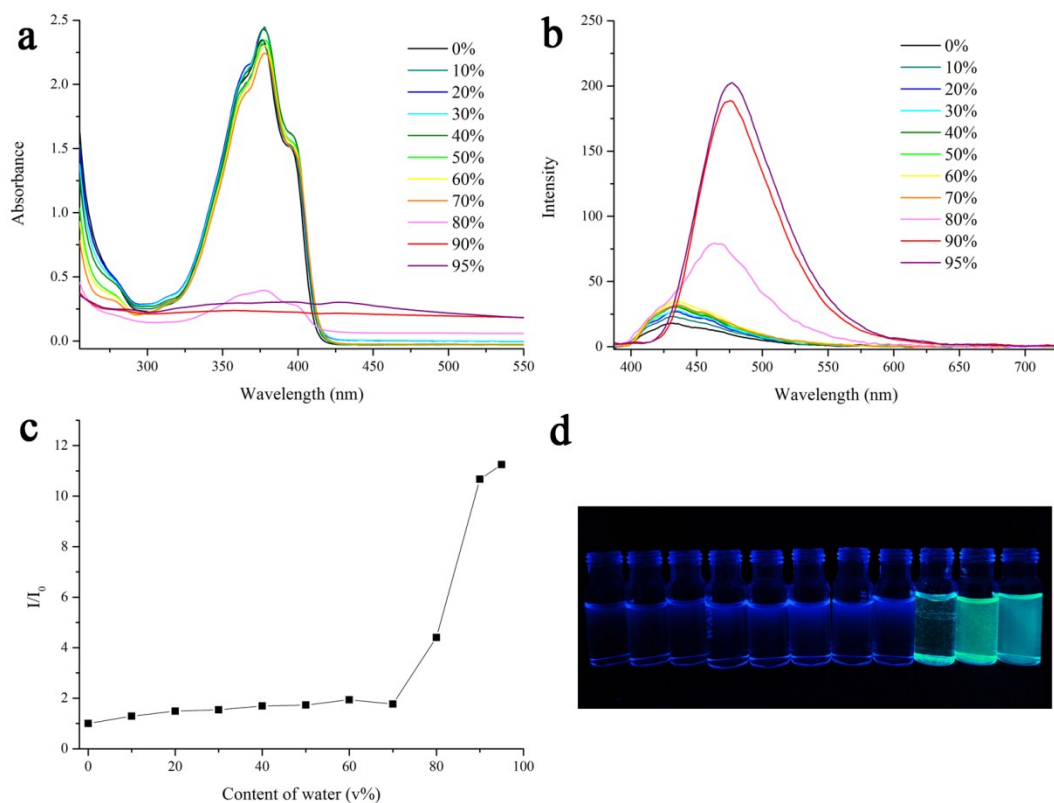

**Figure S11.** (a) UV-vis absorption and (b) fluorescence emission spectra ( $\lambda_{\text{ex}} = 365 \text{ nm}$ ) of **B24B** ( $5 \times 10^{-5} \text{ M}$ ) in THF/H<sub>2</sub>O with different amounts of water (% volume), (c) a plot of PL integral versus water content of the solvent mixture for **B24B** and (d) photograph of **B24B** ( $5 \times 10^{-5} \text{ M}$ ) in THF/H<sub>2</sub>O with different contents of water (0, 10, 20, 30, 40, 50, 60, 70, 80, 90, 95%) under UV light.

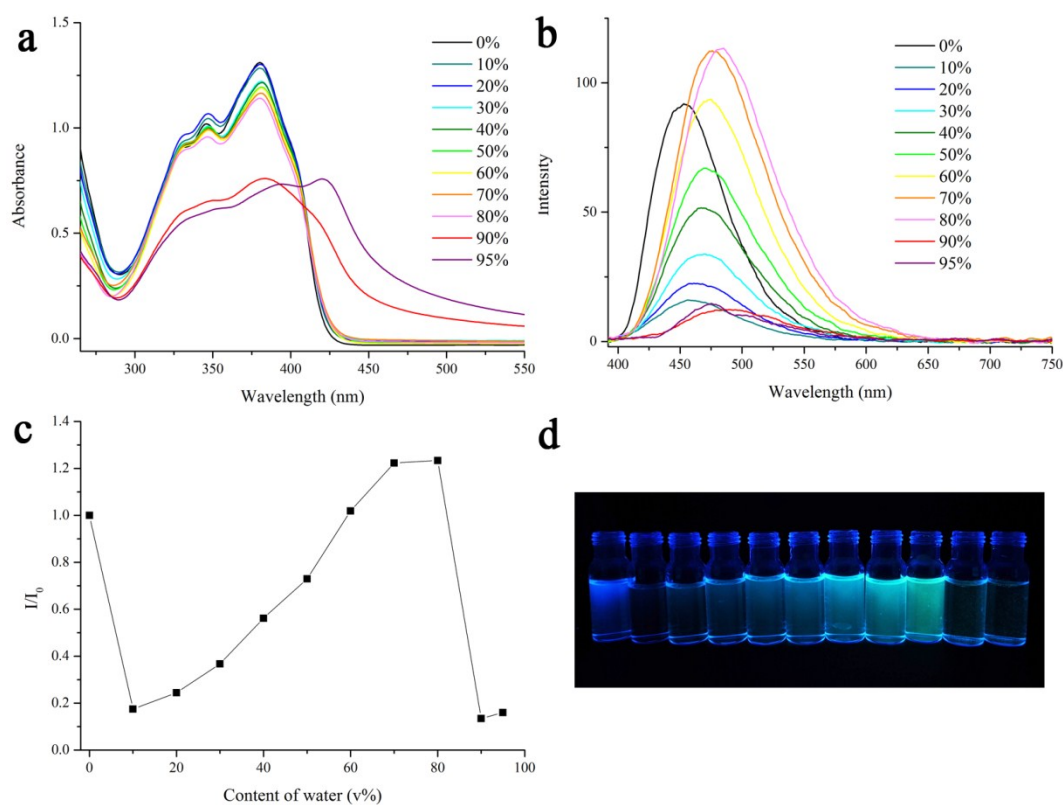

**Figure S12.** (a) UV-vis absorption and (b) fluorescence emission spectra ( $\lambda_{\text{ex}} = 365 \text{ nm}$ ) of **B25B** ( $5 \times 10^{-5} \text{ M}$ ) in THF/H<sub>2</sub>O with different amounts of water (% volume), (c) a plot of PL integral versus water content of the solvent mixture for **B25B** and (d) photograph of **B25B** ( $5 \times 10^{-5} \text{ M}$ ) in THF/H<sub>2</sub>O with different contents of water (0, 10, 20, 30, 40, 50, 60, 70, 80, 90, 95%) under UV light.

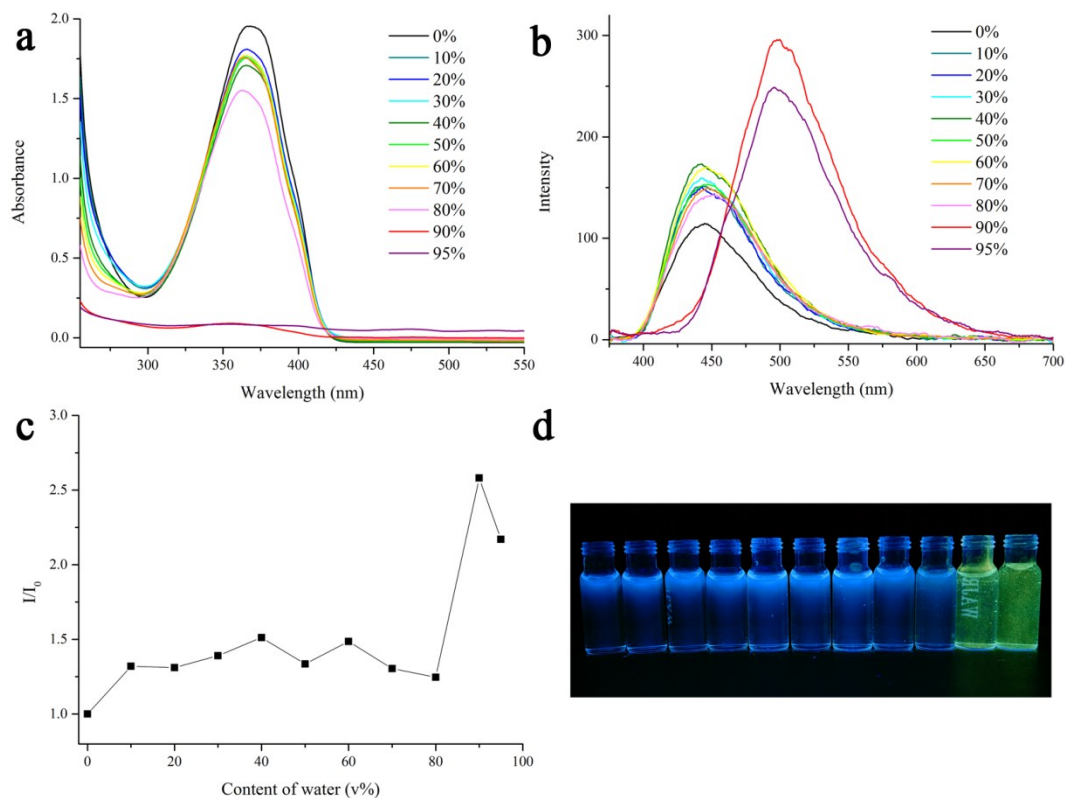

**Figure S13.** (a) UV-vis absorption and (b) fluorescence emission spectra ( $\lambda_{\text{ex}} = 365 \text{ nm}$ ) of **B345B** ( $5 \times 10^{-5} \text{ M}$ ) in THF/H<sub>2</sub>O with different amounts of water (% volume), (c) a plot of PL integral versus water content of the solvent mixture for **B345B** and (d) photograph of **B345B** ( $5 \times 10^{-5} \text{ M}$ ) in THF/H<sub>2</sub>O with different contents of water (0, 10, 20, 30, 40, 50, 60, 70, 80, 90, 95%) under UV light.

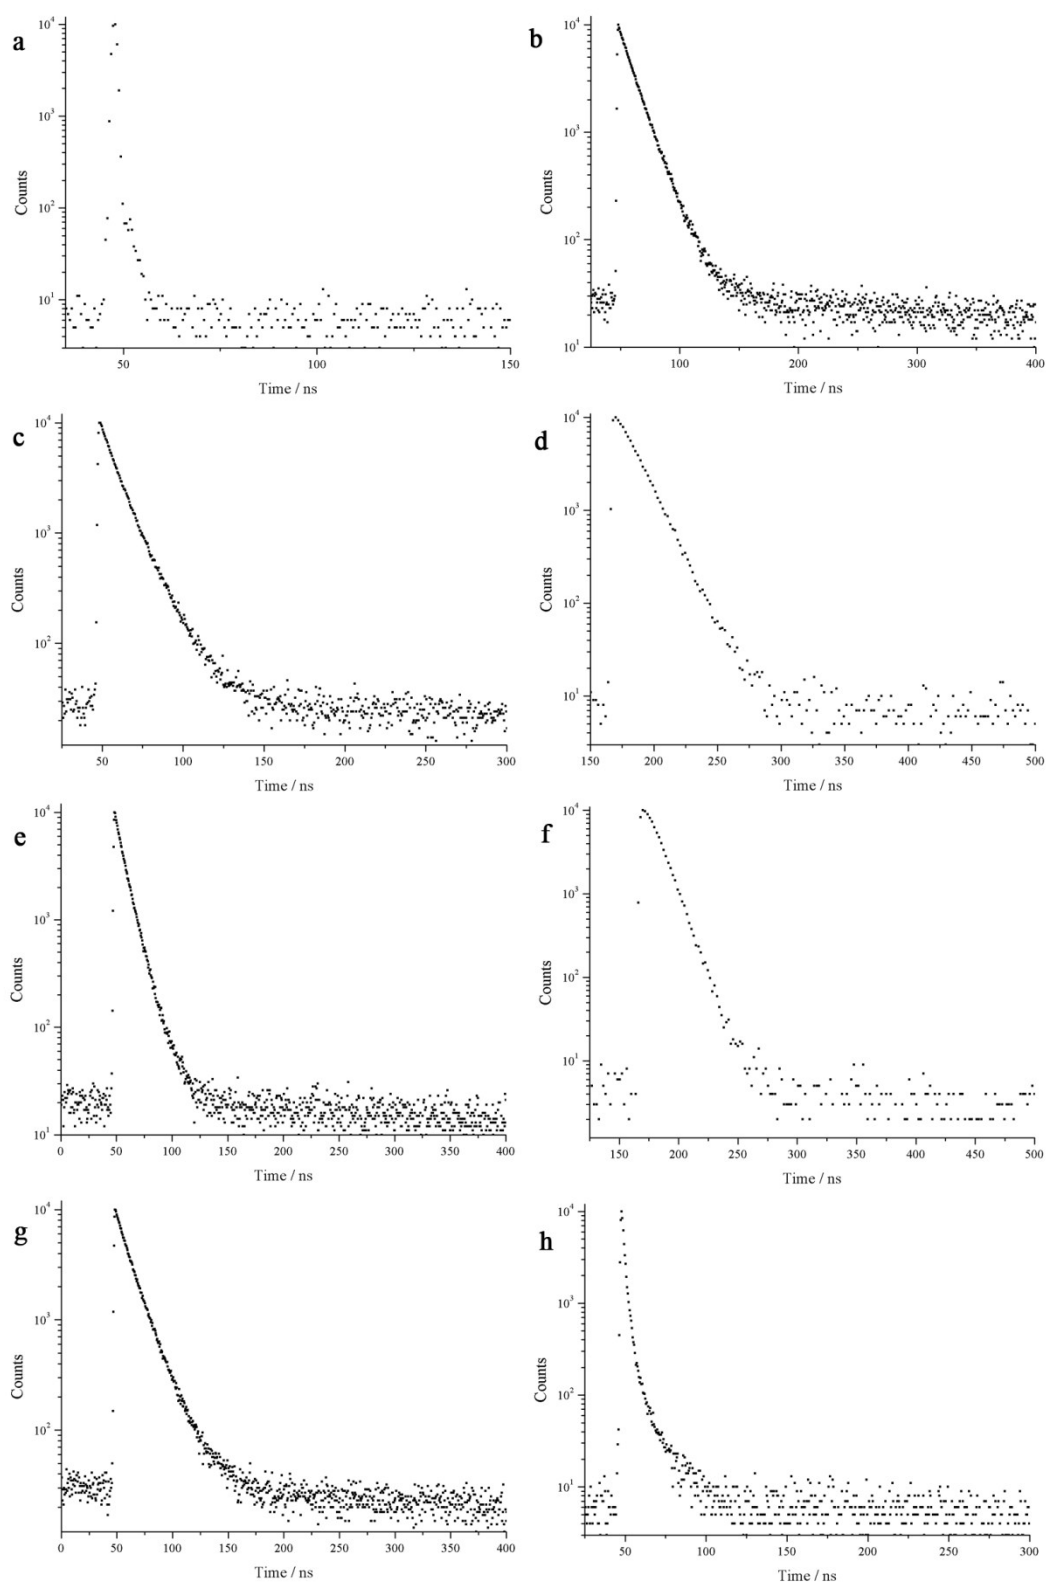

**Figure S14.** Time-resolved emission decay curves of **B4B** in THF monitored at 430 nm (a); in THF/H<sub>2</sub>O ( $v/v = 2/8$ ) monitored at 480 nm (b); in THF/H<sub>2</sub>O ( $v/v = 1/9$ ) monitored at 480 nm (c); in THF/H<sub>2</sub>O ( $v/v = 1/9$ ) monitored at 550 nm (d); in crystal state monitored at 480 nm (e); in crystal state monitored at 550 nm (f); in ground powder 1 monitored at 505 nm (g) and in ground powder 2 monitored at 450 nm (h).

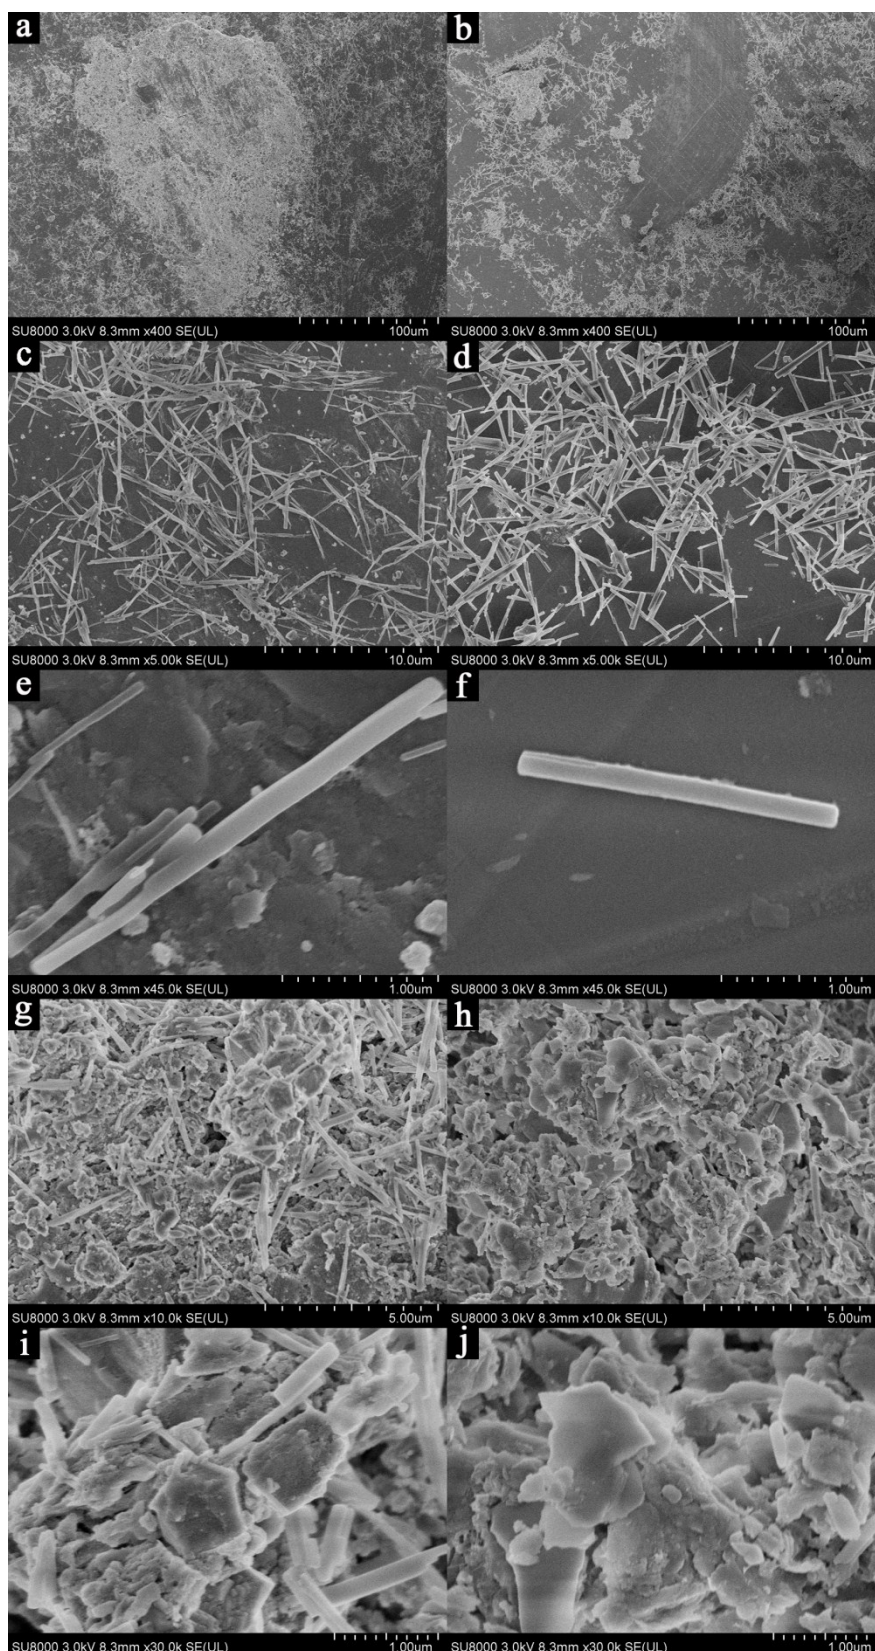

**Figure S15.** SEM images of the aggregates gained from **B4B** in THF/H<sub>2</sub>O with water content of 80% (a) and 90% (b); SEM images of the fibres generated from **B4B** in THF/H<sub>2</sub>O with water content of 80% (c, e) and 90% (d, f); SEM images of the blocky structures generated from **B4B** in THF/H<sub>2</sub>O with water content of 80% (g, i) and 90% (h, j).

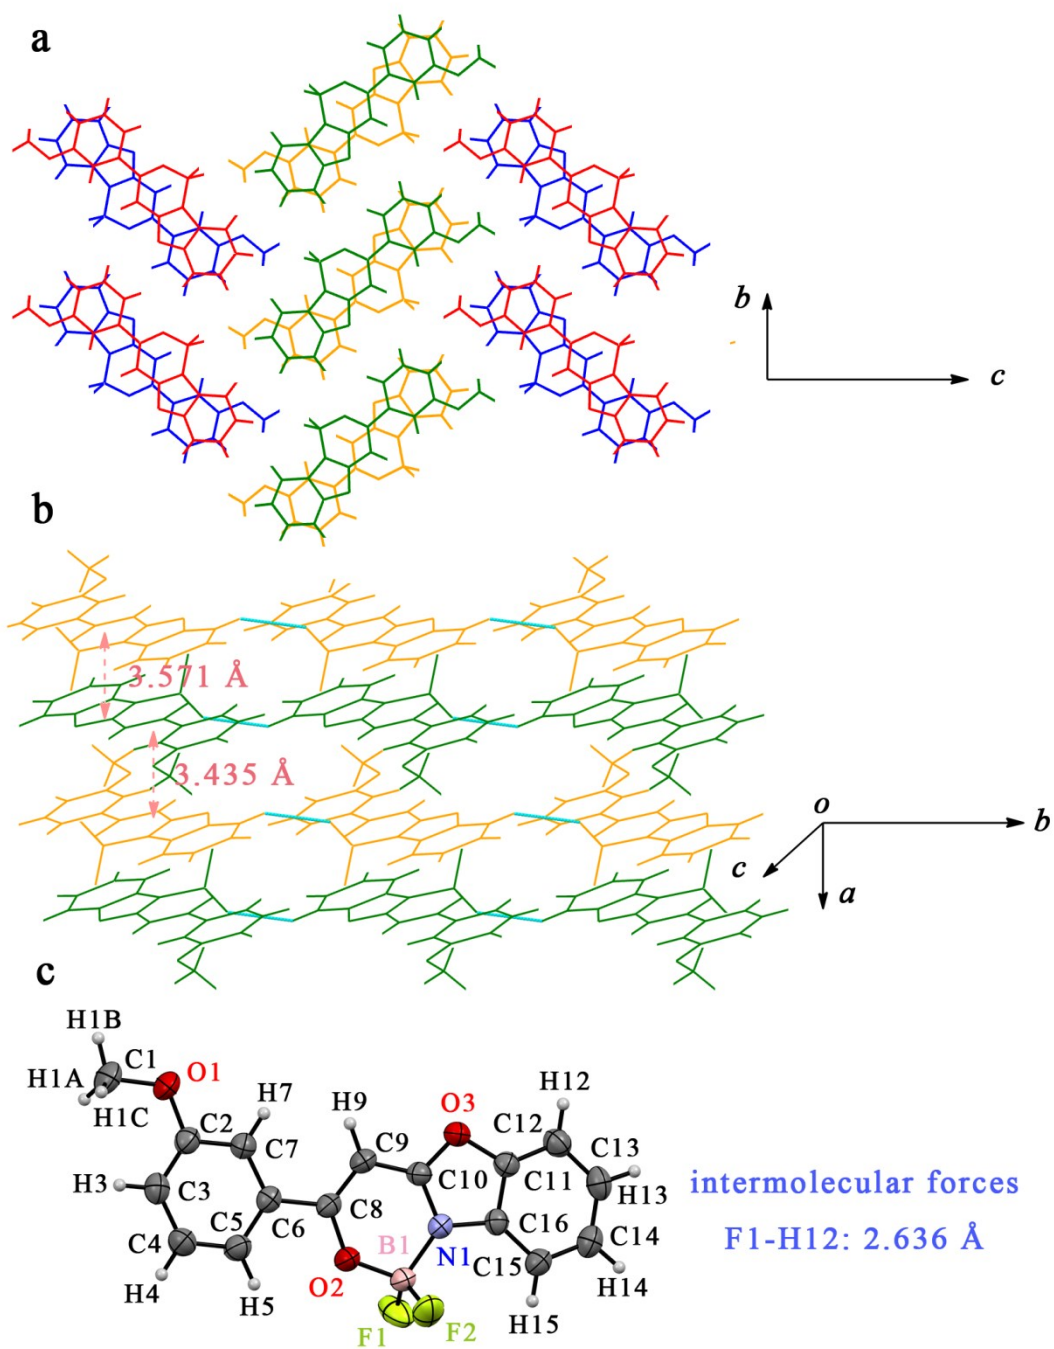

**Figure S16.** (a) Crystal structure of **B3B** viewed along *a* axis; (b) crystal structure of **B3B**, intermolecular forces (blue line) and distances between molecules (pink arrow); (c) ORTEP view and list of intermolecular forces.



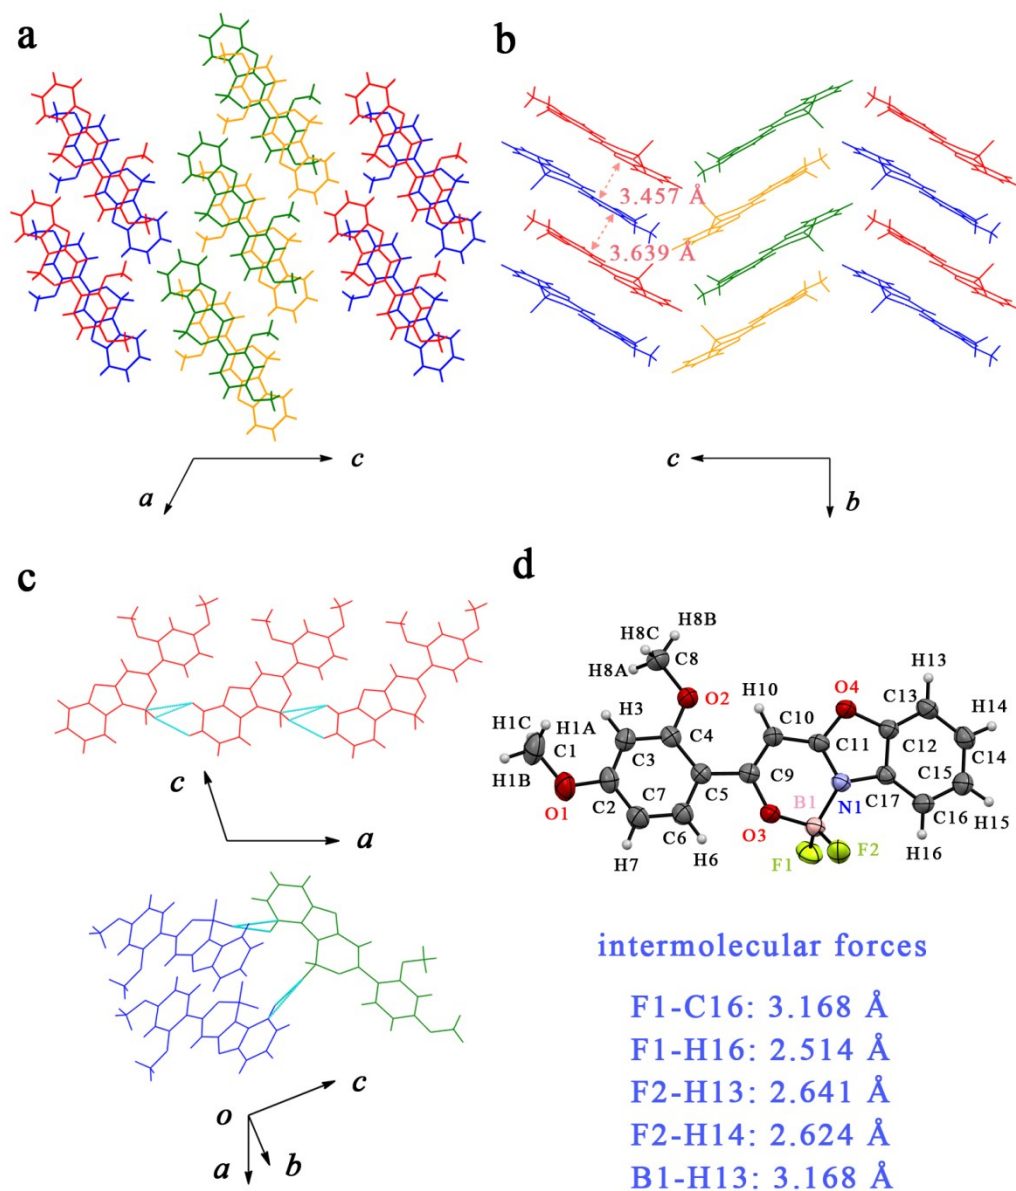

**Figure S17.** (a) Crystal structure of **B24B** viewed along *b* axis; (b) crystal structure of **B24B** viewed along *a* axis, intermolecular forces (blue line) and distances between molecules (pink arrow); (c) ORTEP view and list of intermolecular forces.

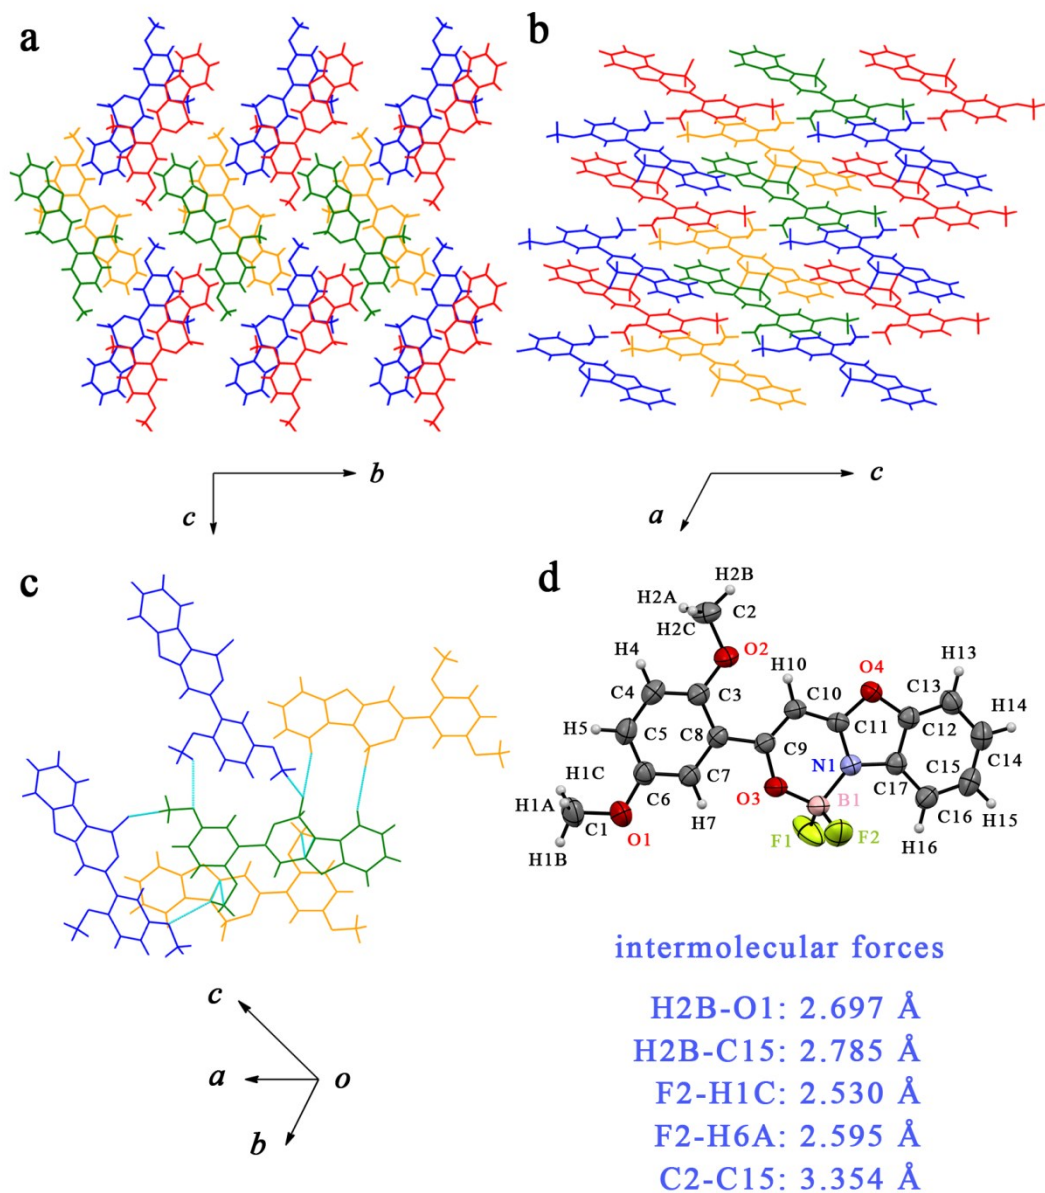

**Figure S18.** (a) Crystal structure of **B25B** viewed along *a* axis; (b) crystal structure of **B25B** viewed along *b* axis; (c) intermolecular forces (blue line); (d) ORTEP view and list of intermolecular forces.

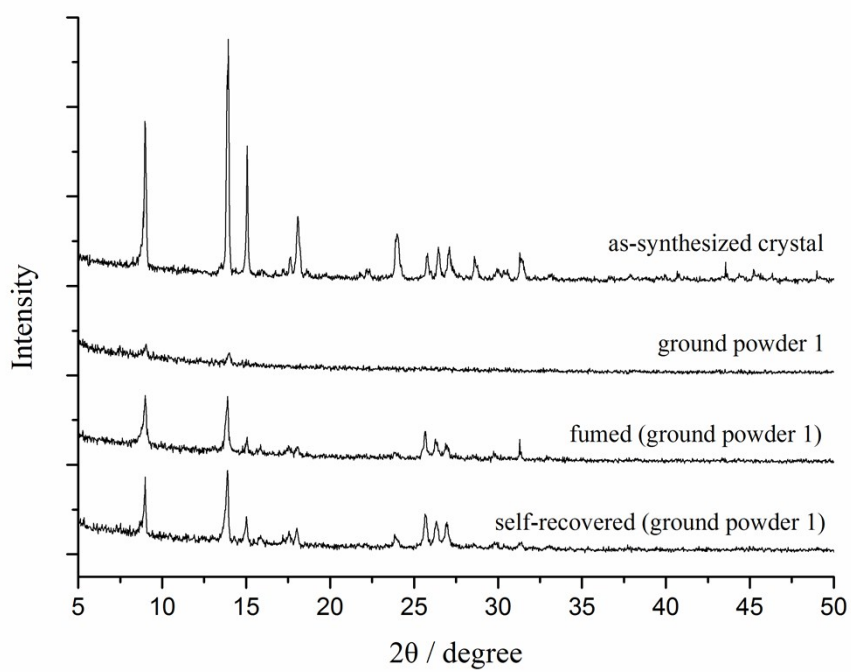

**Figure S19.** XRD patterns of **B4B** in different solid states.

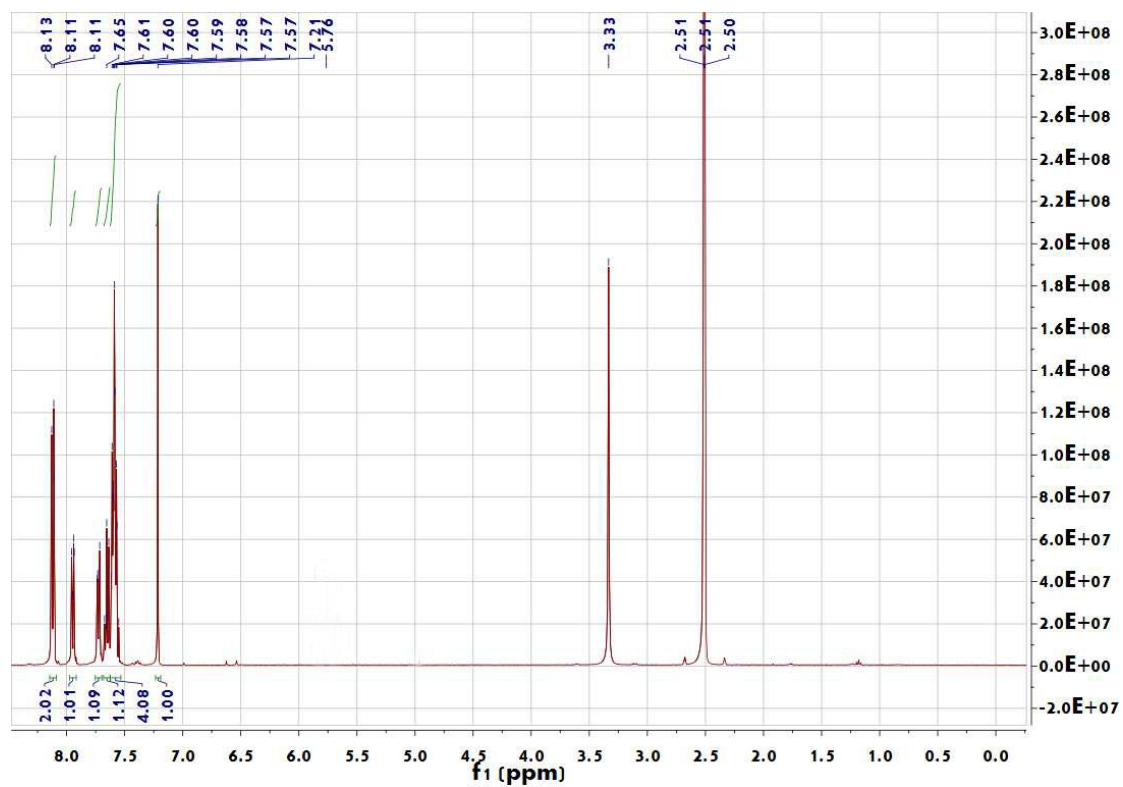

Figure S20.  $^1\text{H}$  NMR (400 MHz) spectrum of compound **BB** in  $\text{DMSO-}d_6$

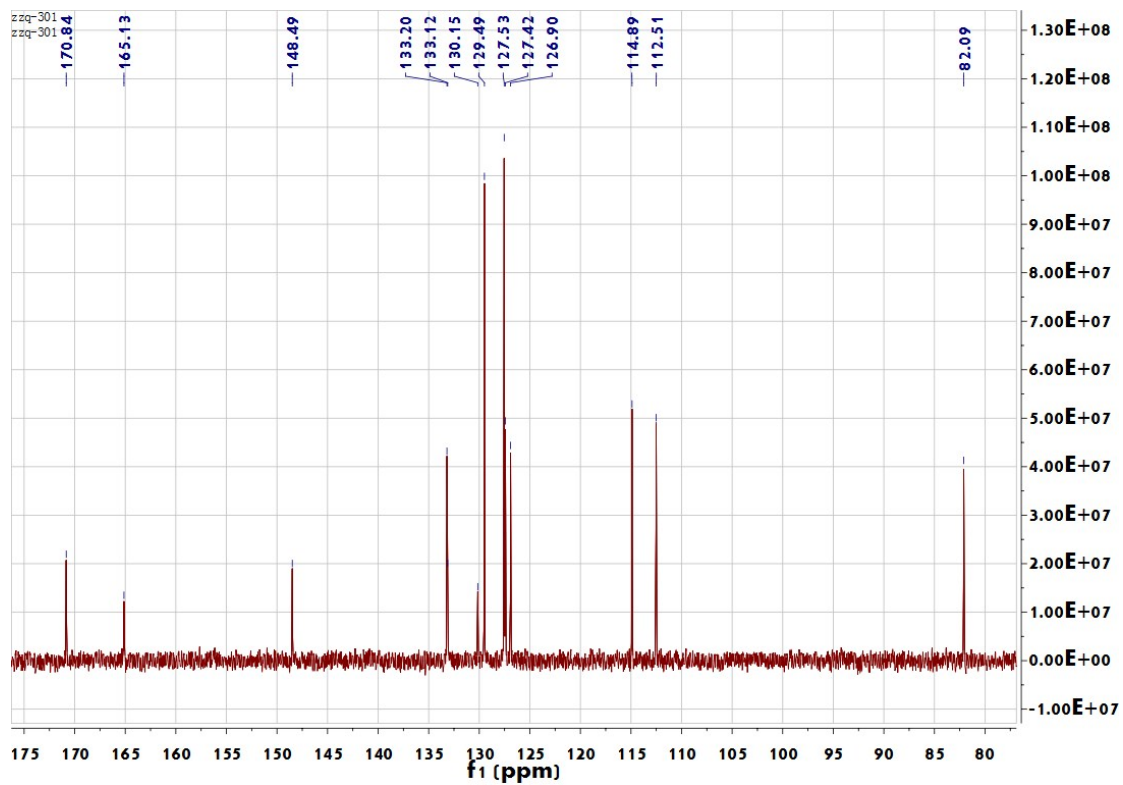

Figure S21.  $^{13}\text{C}$  NMR (100 MHz) spectrum of compound **BB** in  $\text{DMSO-}d_6$

Reflectron Mode

Data: LR-159-L0001.H5 17 Jul 2014 13:46 Cal: 18 Jul 2014 14:07

Kratos PC Axima CFR V2.3.1: Mode default\_linear, Power: 54, P.Ext. @ 285 (bin 57)  
%Int. 455 mV[sum= 14091 mV] Profiles 27-57 Smooth Av 20 -Baseline 80

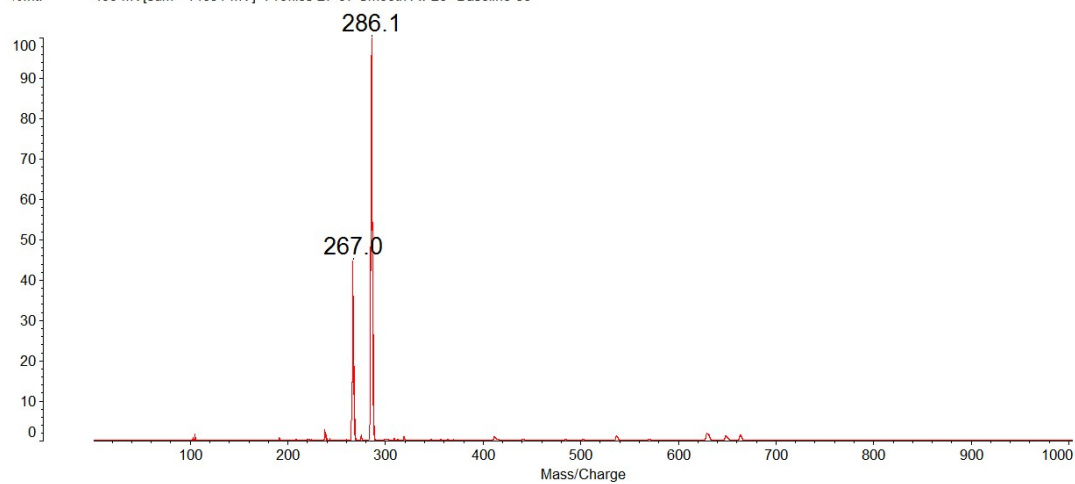

Figure S22. MALDI/TOF MS spectrum of compound **BB**.

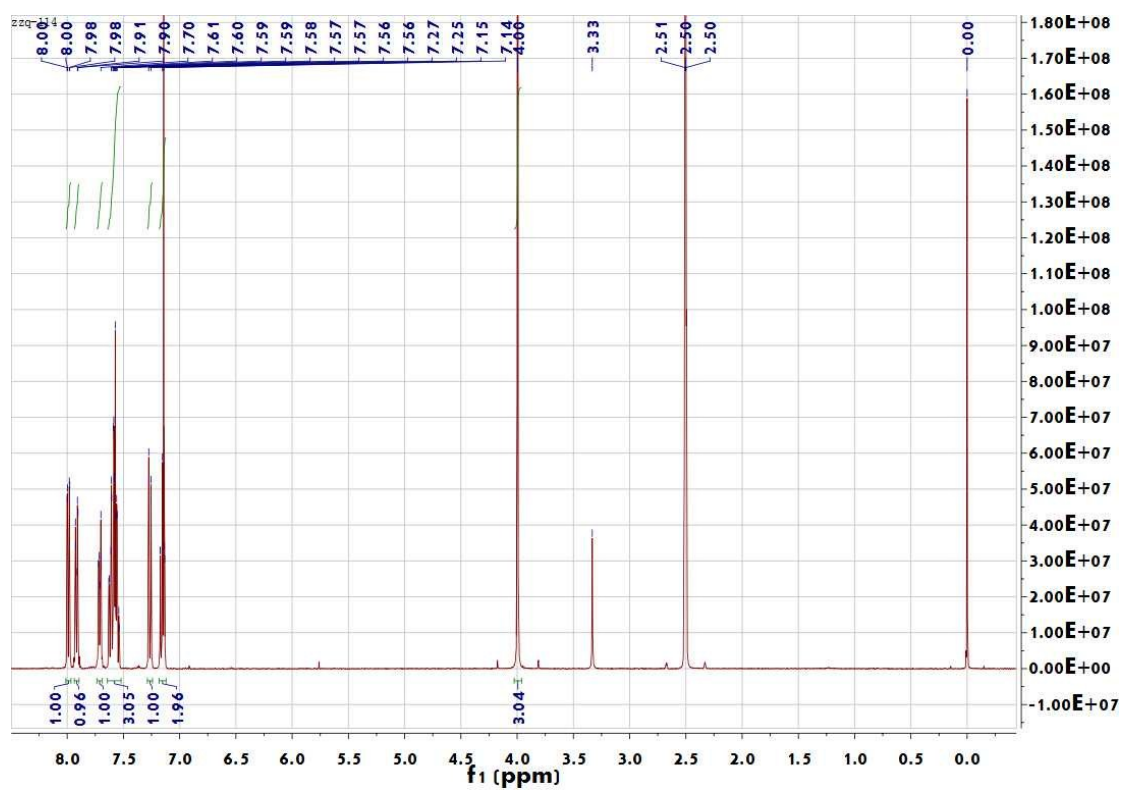

Figure S23. <sup>1</sup>H NMR (400 MHz) spectrum of compound **B2B** in DMSO-*d*<sub>6</sub>

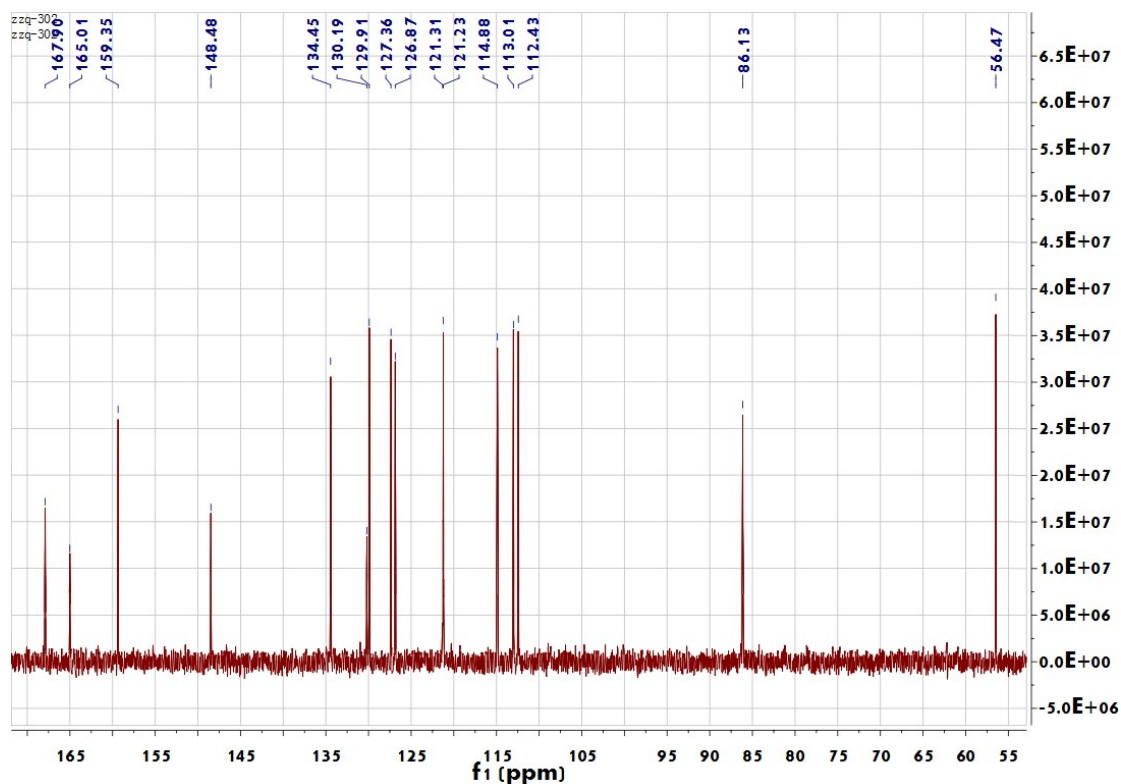

**Figure S24.** <sup>13</sup>C NMR (100 MHz) spectrum of compound **B2B** in DMSO-*d*<sub>6</sub>

Reflectron Mode

Data: LR-160-L0001.G5 17 Jul 2014 13:47 Cal: 18 Jul 2014 14:10  
 Kratos PC Axima CFR V2.3.1: Mode default\_linear, Power: 60, P.Ext. @ 315 (bin 57)  
 %Int. 433 mV[sum= 13860 mV] Profiles 9-40 Smooth Av 20 -Baseline 80

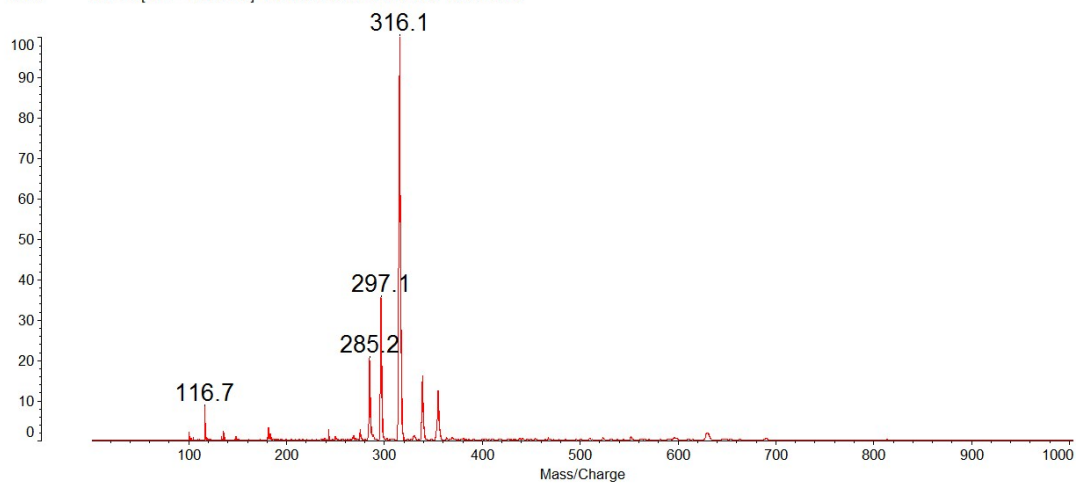

**Figure S25.** MALDI/TOF MS spectrum of compound **B2B**

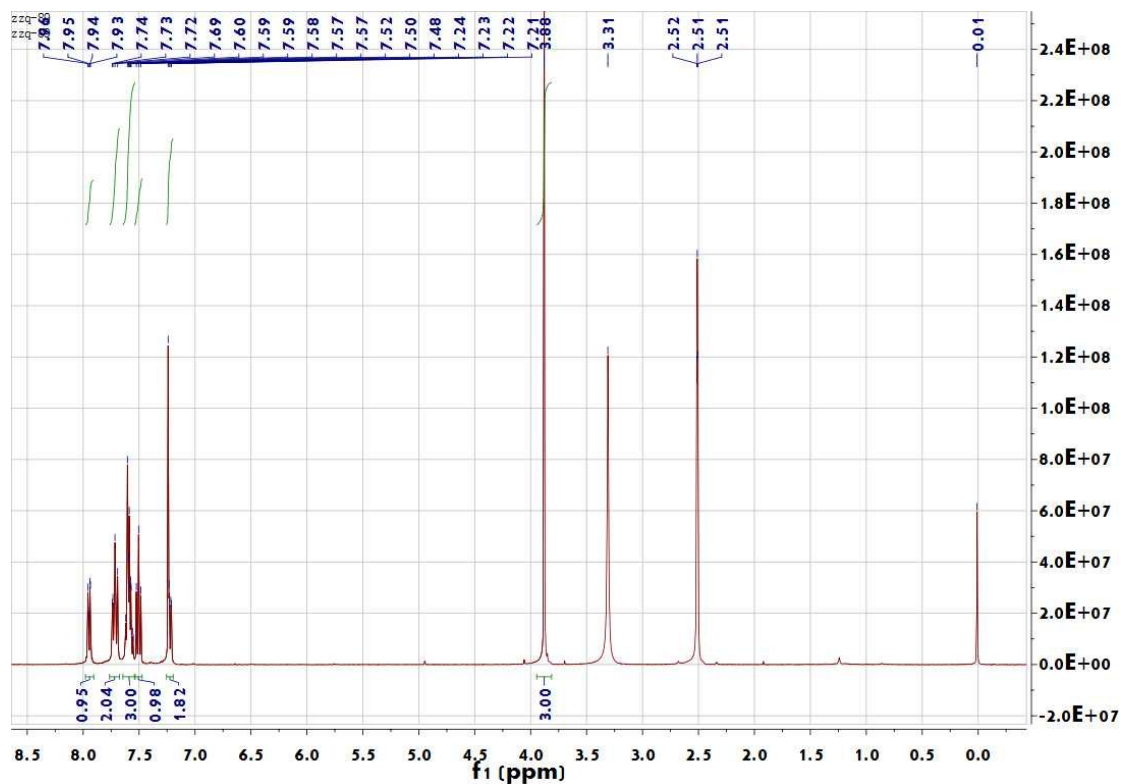

Figure S26.  $^1\text{H}$  NMR (400 MHz) spectrum of compound **B3B** in  $\text{DMSO-}d_6$

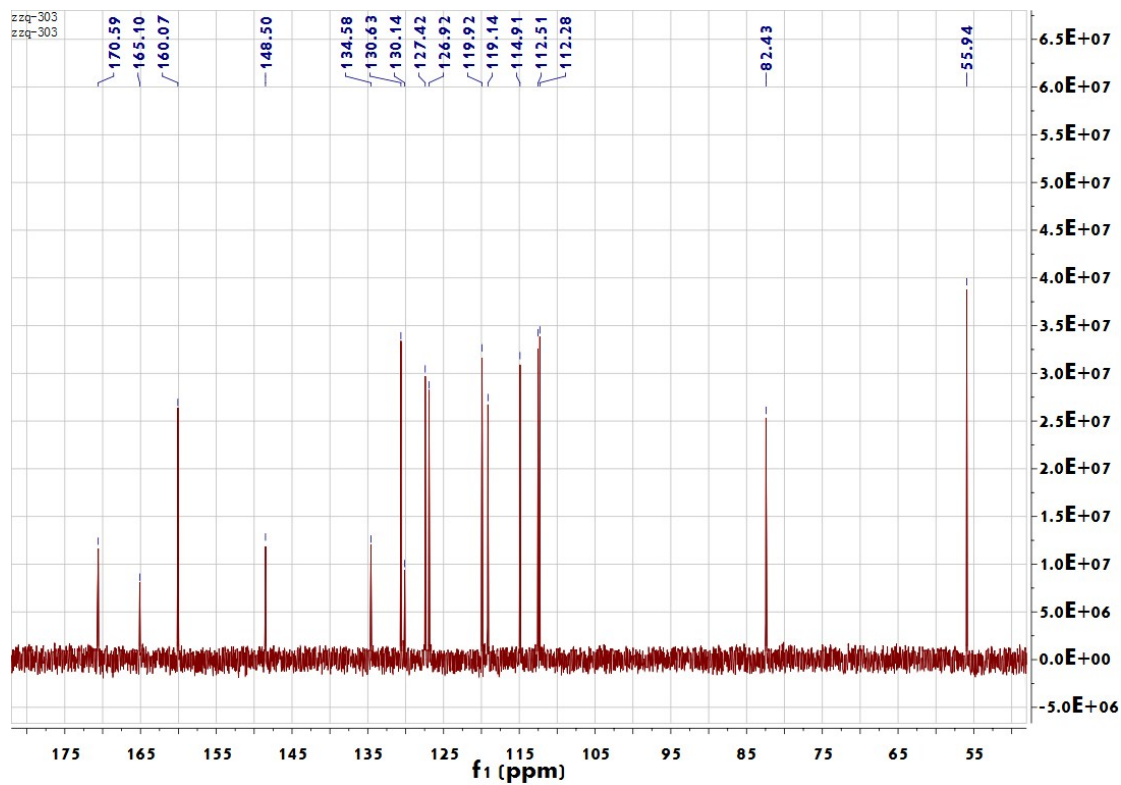

Figure S27.  $^{13}\text{C}$  NMR (100 MHz) spectrum of compound **B3B** in  $\text{DMSO-}d_6$

Reflectron Mode

Data: LR-161-L0001.E5 17 Jul 2014 13:48 Cal: 18 Jul 2014 14:11  
Kratos PC Axima CFR V2.3.1. Mode default\_linear, Power: 53, P.Ext. @ 315 (bin 57)  
%Int. 475 mV[sum= 7126 mV] Profiles 14-28 Smooth Av 20 -Baseline 80

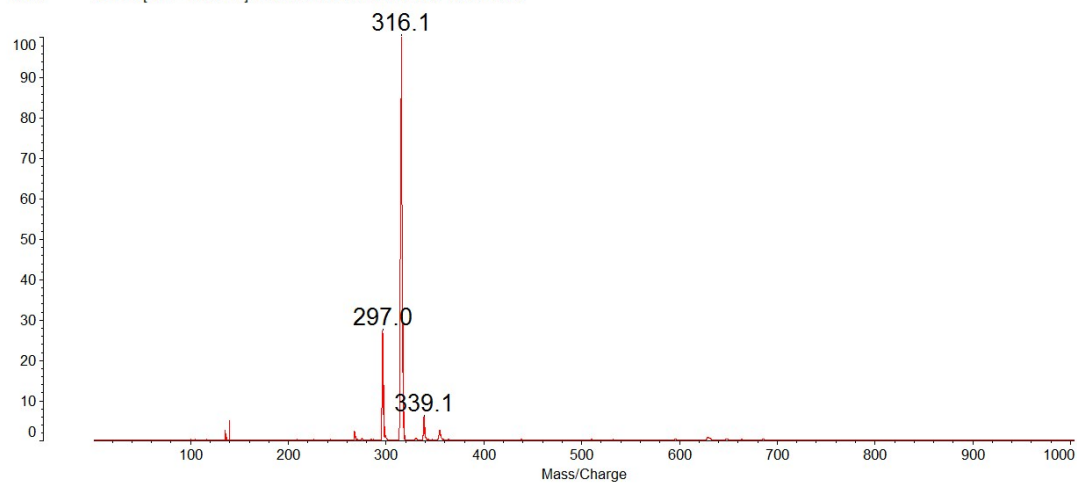

Figure S28. MALDI/TOF MS spectrum of compound **B3B**.

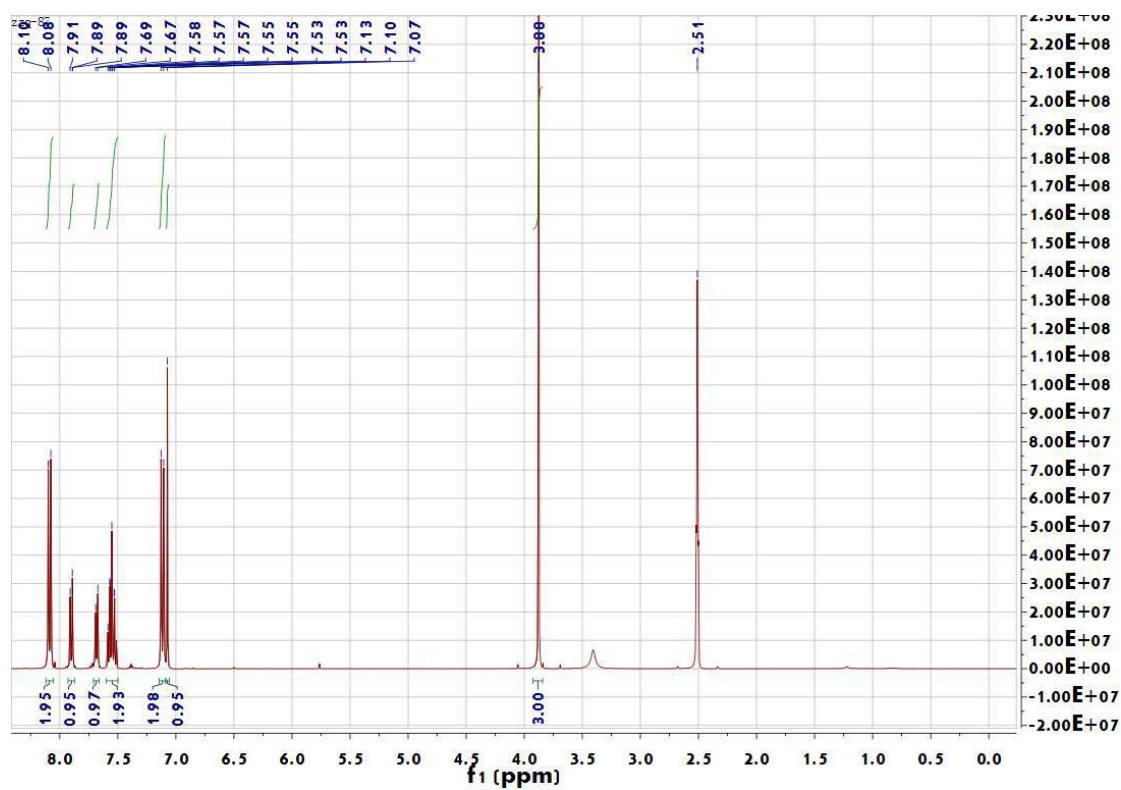

Figure S29.  $^1\text{H}$  NMR (400 MHz) spectrum of compound **B4B** in  $\text{DMSO-}d_6$



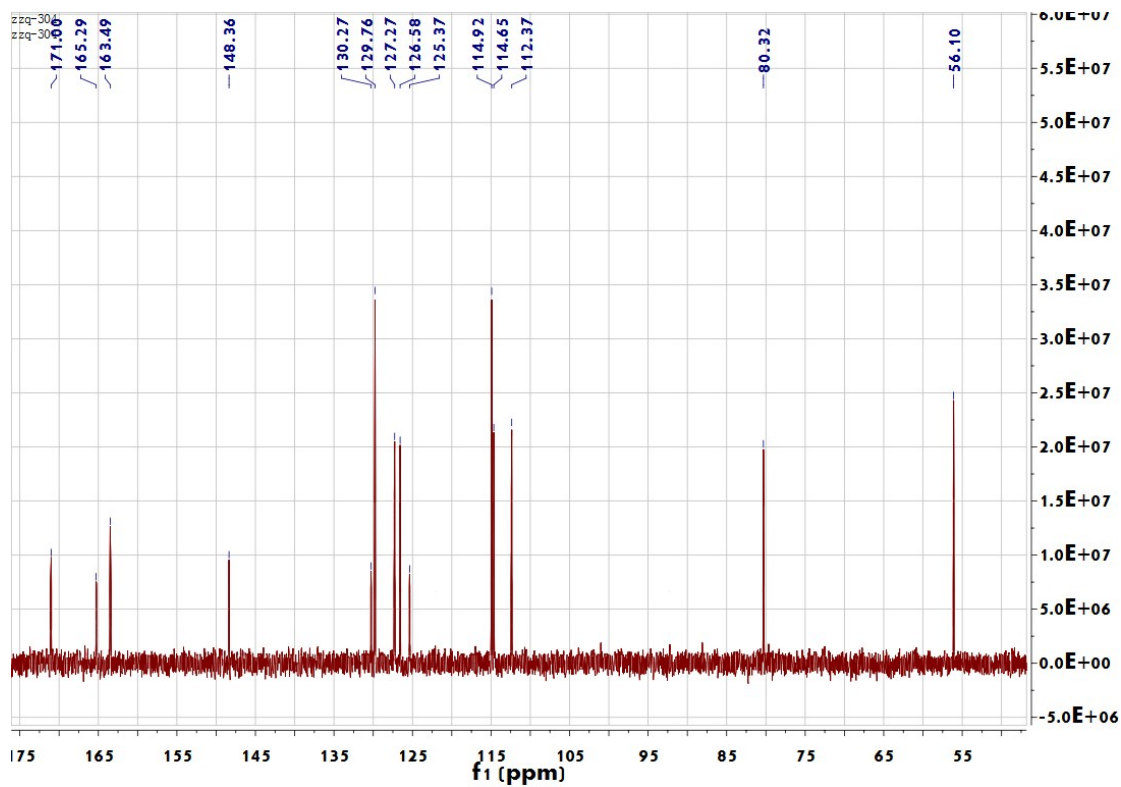

**Figure S30.** <sup>13</sup>C NMR (100 MHz) spectrum of compound **B4B** in DMSO-*d*<sub>6</sub>

Reflectron Mode

Data: LR-162-L0001.D5 17 Jul 2014 13:49 Cal: 18 Jul 2014 14:12  
 Kratos PC Axima CFR V2.3.1: Mode default\_linear, Power: 44, P.Ext. @ 315 (bin 57)  
 %Int. 60 mV[sum= 1846 mV] Profiles 7-37 Smooth Av 20 -Baseline 80

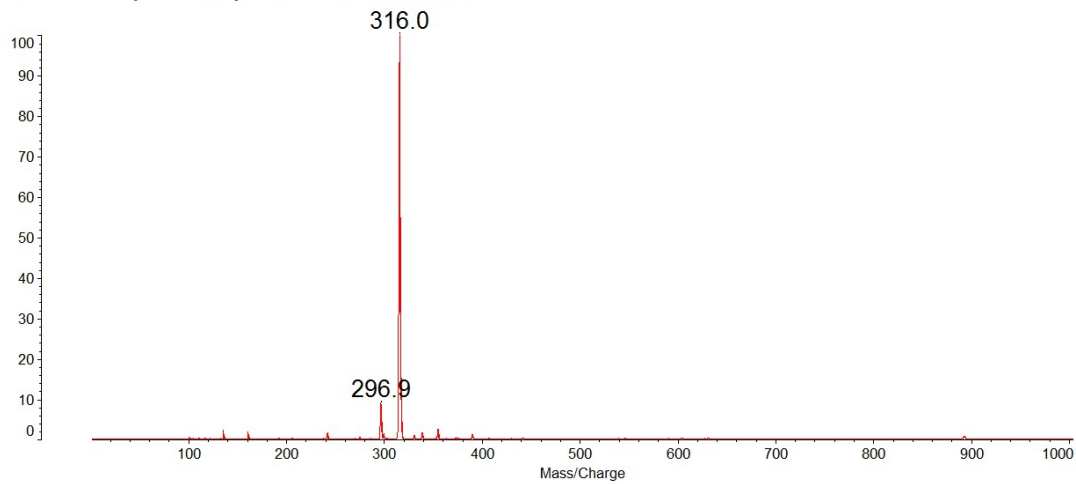

**Figure S31.** MALDI/TOF MS spectrum of compound **B4B**.

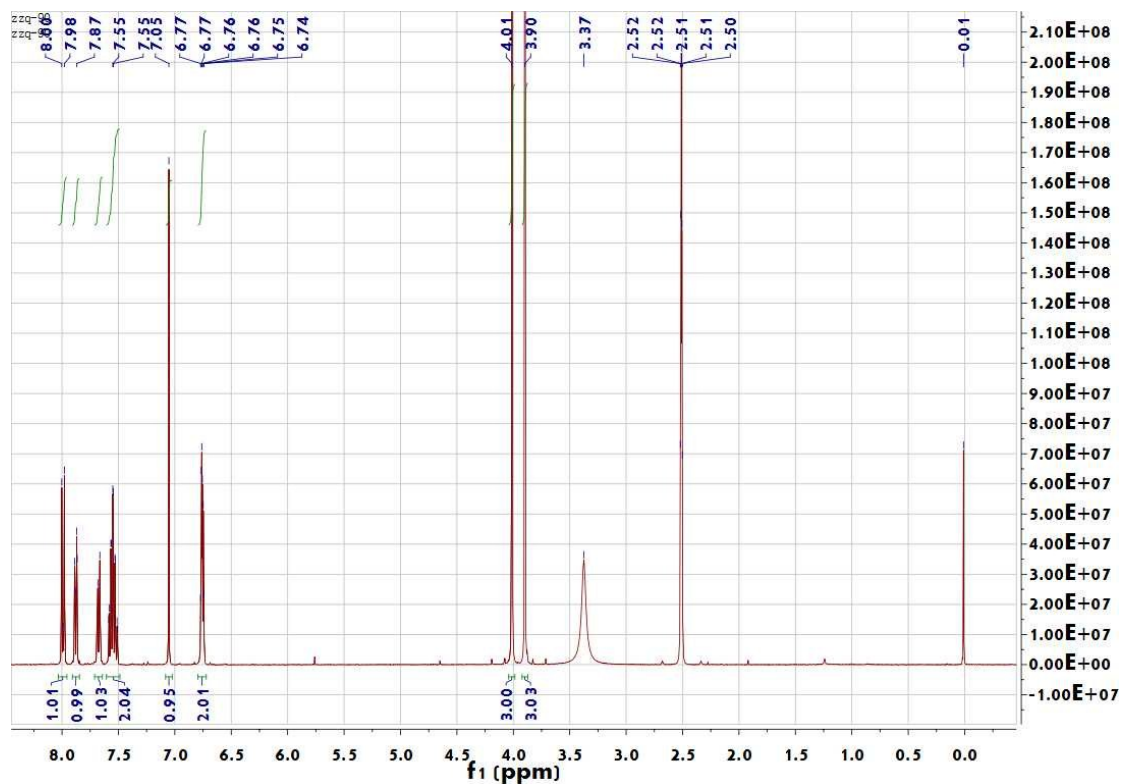

Figure S32.  $^1\text{H}$  NMR (400 MHz) spectrum of compound **B24B** in  $\text{DMSO-}d_6$

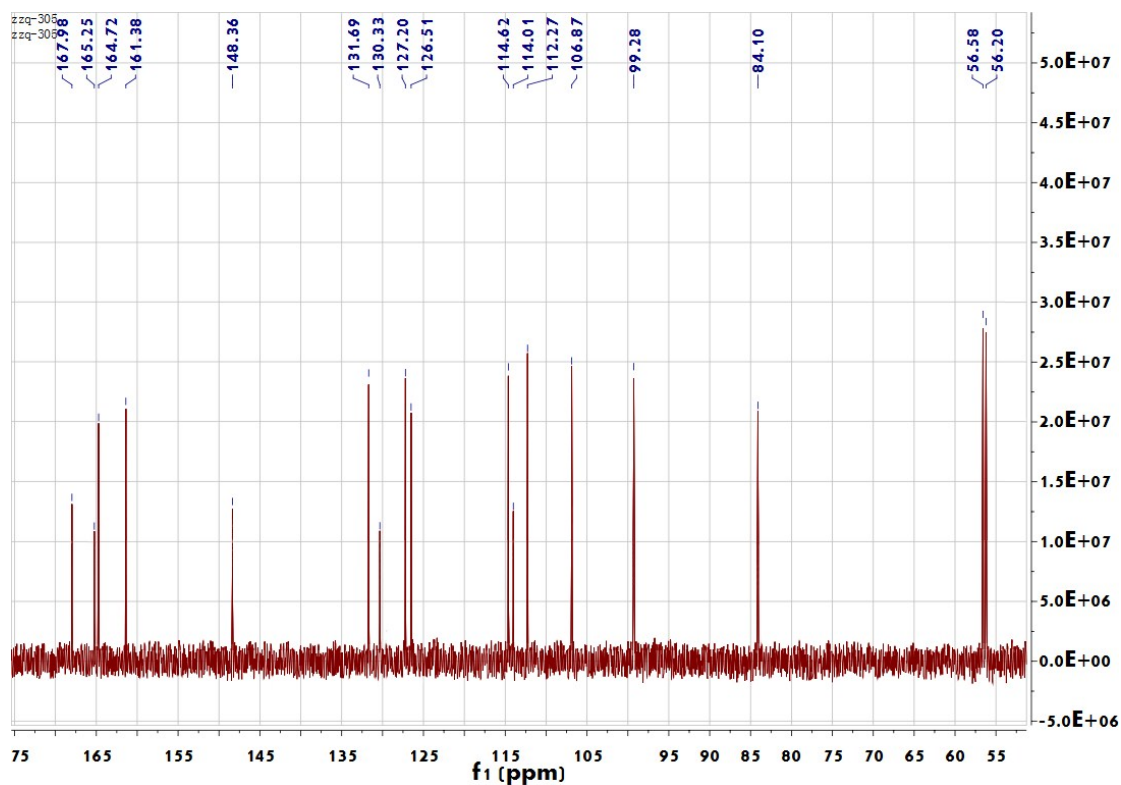

Figure S33.  $^{13}\text{C}$  NMR (100 MHz) spectrum of compound **B24B** in  $\text{DMSO-}d_6$

Reflectron Mode

Data: LR-163-L0001.C5 17 Jul 2014 13:50 Cal: 18 Jul 2014 14:12  
Kratos PC Axima CFR V2.3.1: Mode default\_linear, Power: 55, P.Ext. @ 345 (bin 57)  
%Int. 330 mV[sum= 8255 mV] Profiles 10-34 Smooth Av 20 -Baseline 80

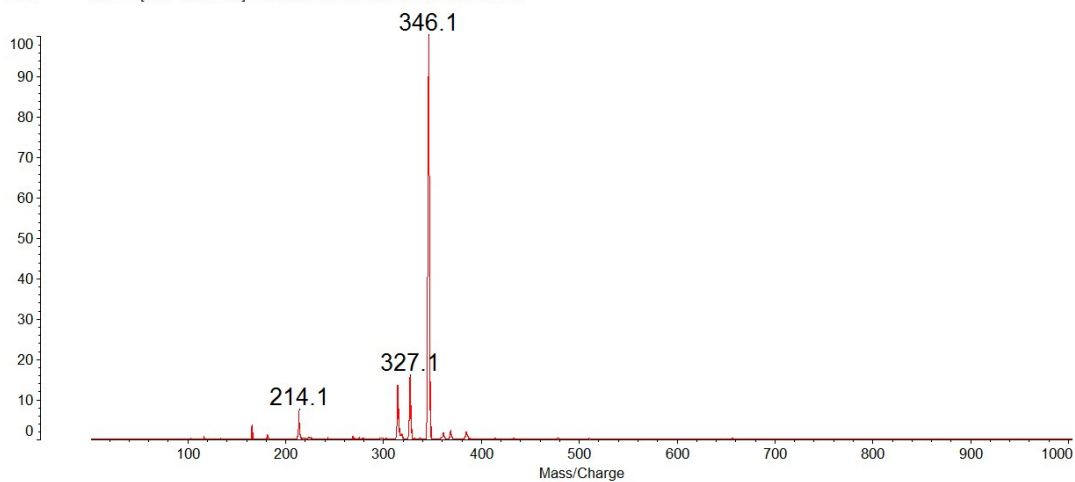

Figure S34. MALDI/TOF MS spectrum of compound **B24B**.

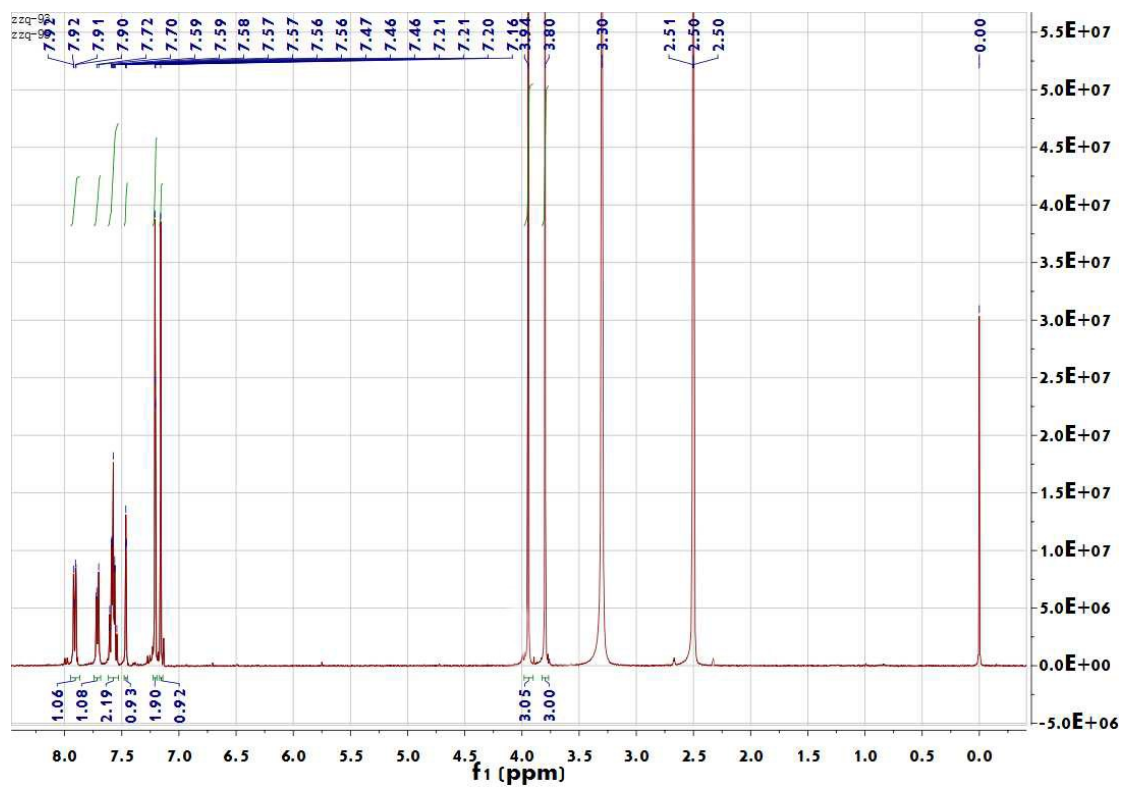

Figure S35.  $^1\text{H}$  NMR (400 MHz) spectrum of compound **B25B** in  $\text{DMSO-}d_6$

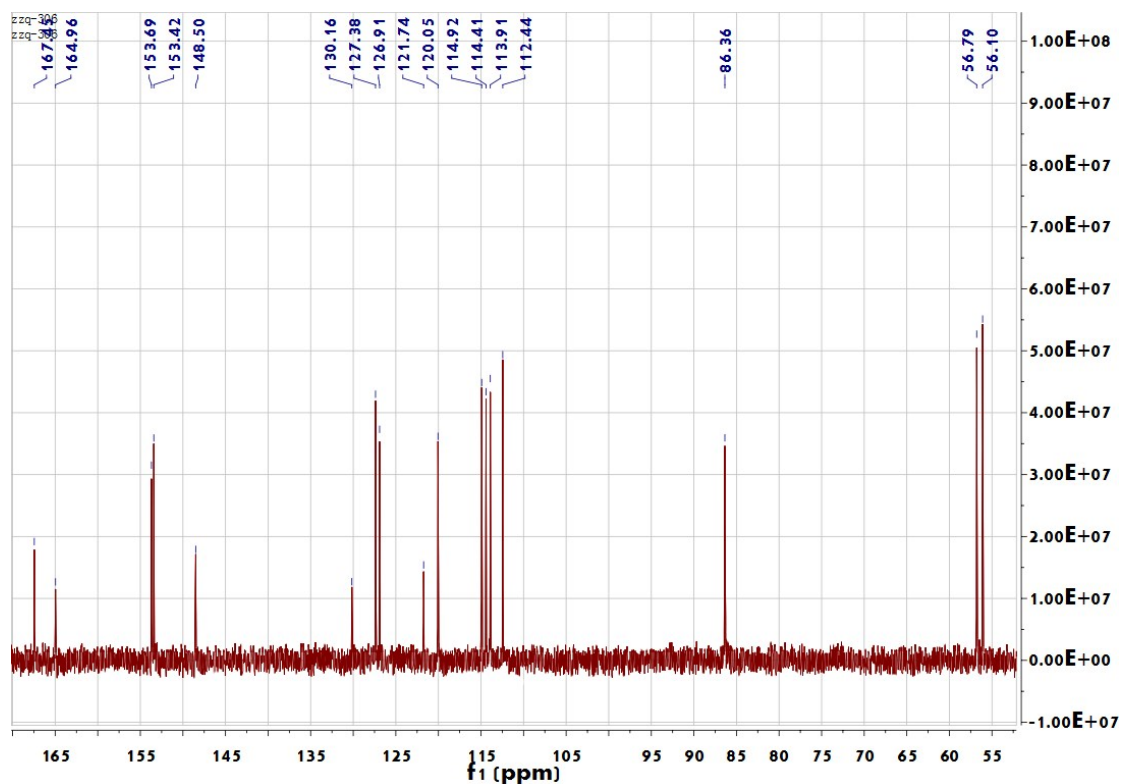

Figure S36.  $^{13}\text{C}$  NMR (100 MHz) spectrum of compound **B25B** in  $\text{DMSO-}d_6$

Reflectron Mode

Data: LR-227-L0001.08 11 Nov 2014 12:05 Cal: 11 Nov 2014 14:44  
 Kratos PC Axima CFR V2.3.1: Mode default\_linear, Power: 90, P.Ext. @ 345 (bin 57)  
 %Int. 205 mV[sum= 8202 mV] Profiles 1-40 Smooth Av 20 -Baseline 80

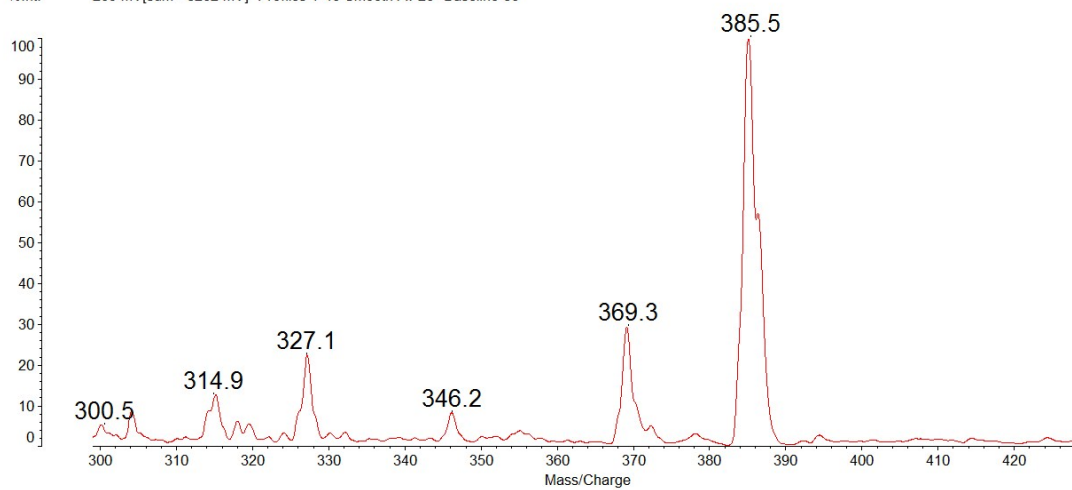

Figure S37. MALDI/TOF MS spectrum of compound **B25B**.

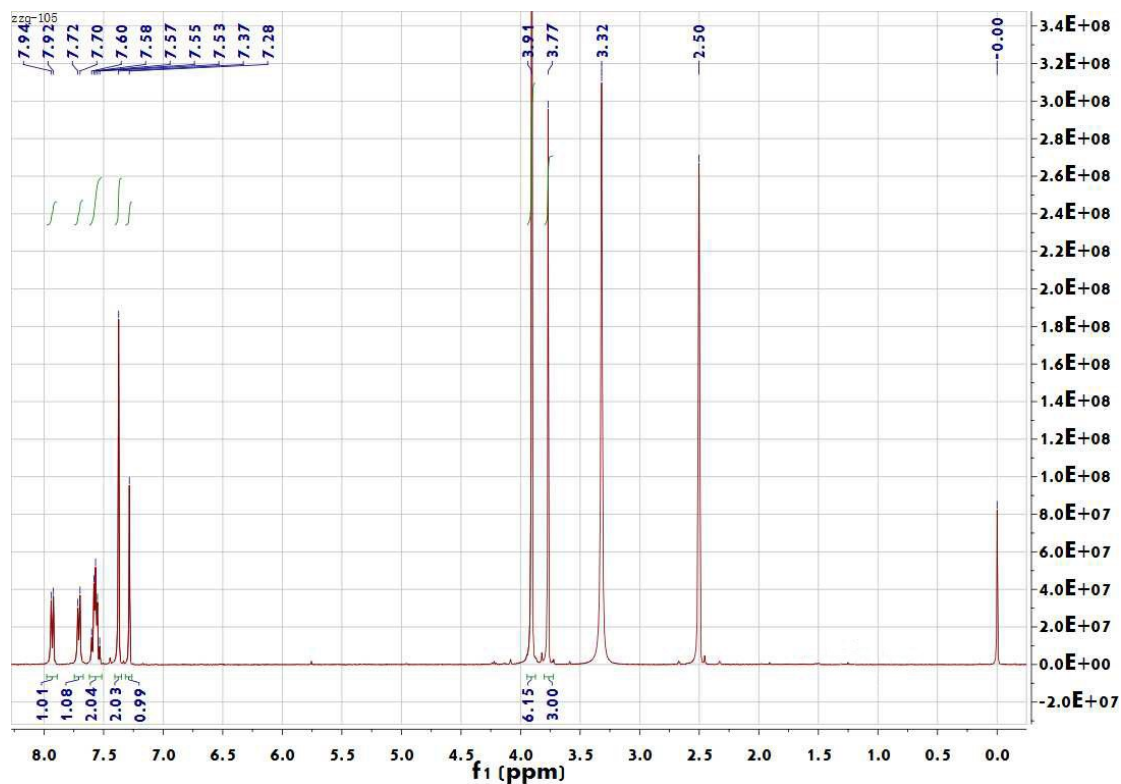

Figure S38.  $^1\text{H}$  NMR (400 MHz) spectrum of compound **B345B** in  $\text{DMSO-}d_6$

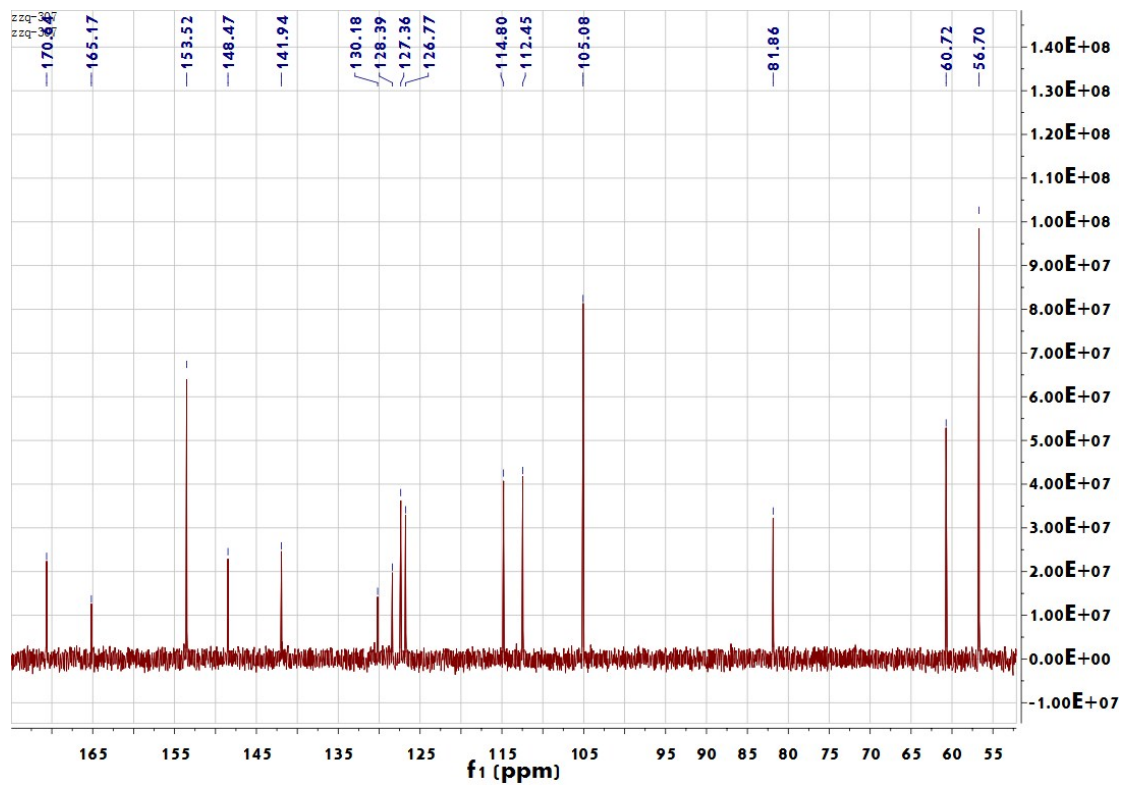

Figure S39.  $^{13}\text{C}$  NMR (100 MHz) spectrum of compound **B345B** in  $\text{DMSO-}d_6$

Reflectron Mode

Data: LR-193-L0001.M8 23 Sep 2014 15:35 Cal: 9 Oct 2014 9:25  
Kratos PC Axima CFR V2.3.1: Mode default\_linear, Power: 50, P.Ext. @ 375 (bin 57)  
%Int. 329 mV[sum= 14804 mV] Profiles 27-71 Smooth Av 20 -Baseline 80

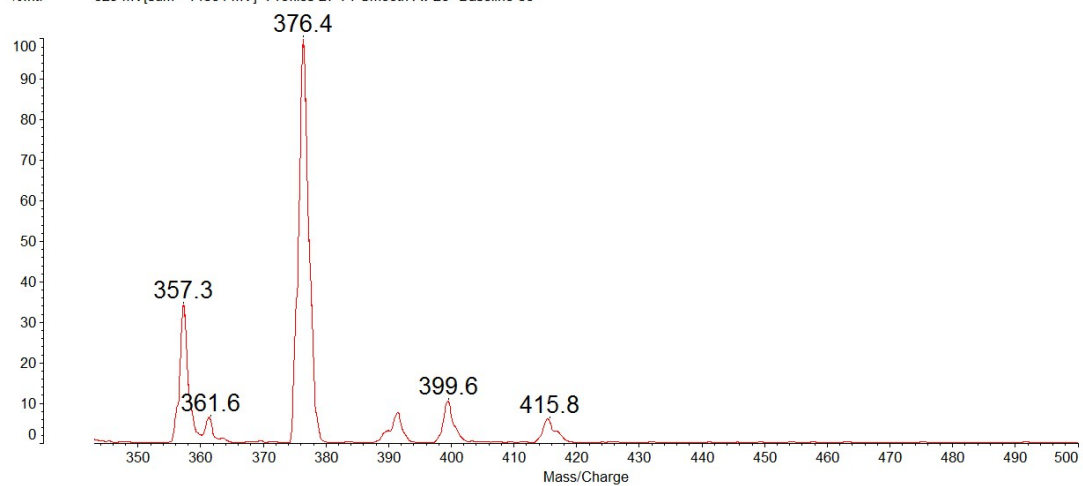

**Figure S40.** MALDI/TOF MS spectrum of compound **B345B**.
